# Supplementary material for: MCC Gene Silencing Is a CpG Island Methylator Phenotype-Associated Factor That Predisposes Colon Cancer Cells to Irinotecan and Olaparib
Source: MDPI journal article supplement (doi:10.3390/cancers14122859), 2022-06-09

## Supplementary Figures and Tables.

Zeenat Jahan, Fahad Benthani, Nicola Currey, Hannah W Parker, Jane E Dahlstrom, C Elizabeth Caldon, Maija RJ Kohonen-Corish.

*MCC* gene silencing is a CpG island methylator phenotype-associated factor that predisposes colon cancer cells to irinotecan and olaparib. *Cancers* 2022; 14

Figure S1: Comparison of *MCC-201* mRNA expression levels with CpG site methylation beta-values in the TCGA COAD cohort.

Figure S2: Comparison of *MCC-201* mRNA expression levels with CpG site methylation beta-values in the TCGA READ cohort.

Figure S3: PARP sub-cellular localization after SN38 exposure of HCT116 cells.

Table S1: *MCC-201* mRNA expression level and CpG site methylation beta-values in the TCGA COAD cohort.

Table S2: *MCC-201* mRNA expression level and methylation beta-values in the TCGA READ cohort.

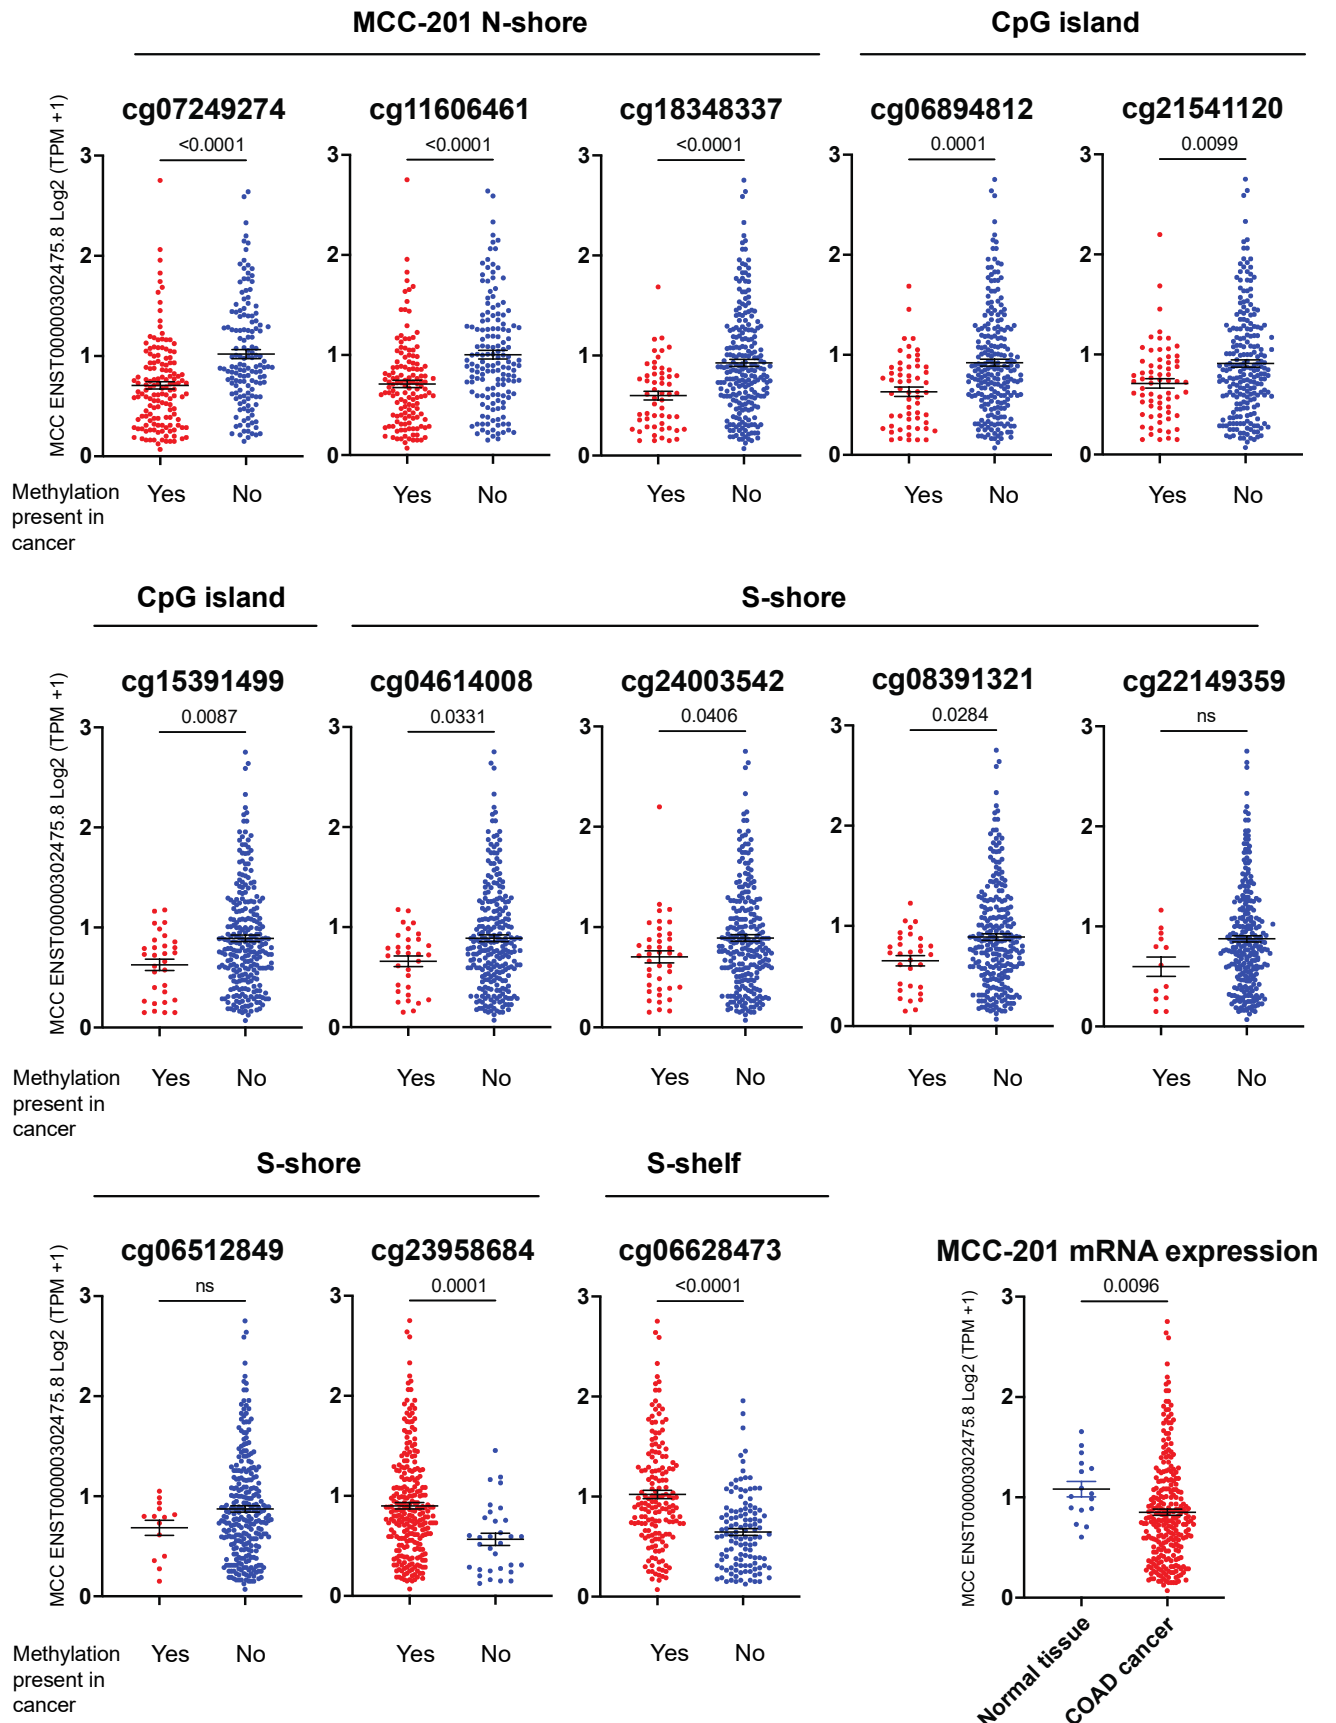

**Supplementary Figure S1.** Down-regulation of the *MCC-201* transcript in colon cancer is associated with hypermethylation of individual CpG sites in the N-shore, CpG island and S-shore or hypomethylation in the S-shore/S-shelf (TCGA 2018 COAD cohort). Statistical significance was determined using the unpaired Mann-Whitney test. Error bars show mean  $\pm$  SEM. Methylation beta-values  $>0.5$  were considered as hypermethylated in cancer if the matching CpG site was unmethylated in normal tissue. Methylation beta-values  $<0.4$  were considered as hypomethylated in cancer if the site was methylated in normal tissue. Detailed data are shown in Supplementary Table S1.

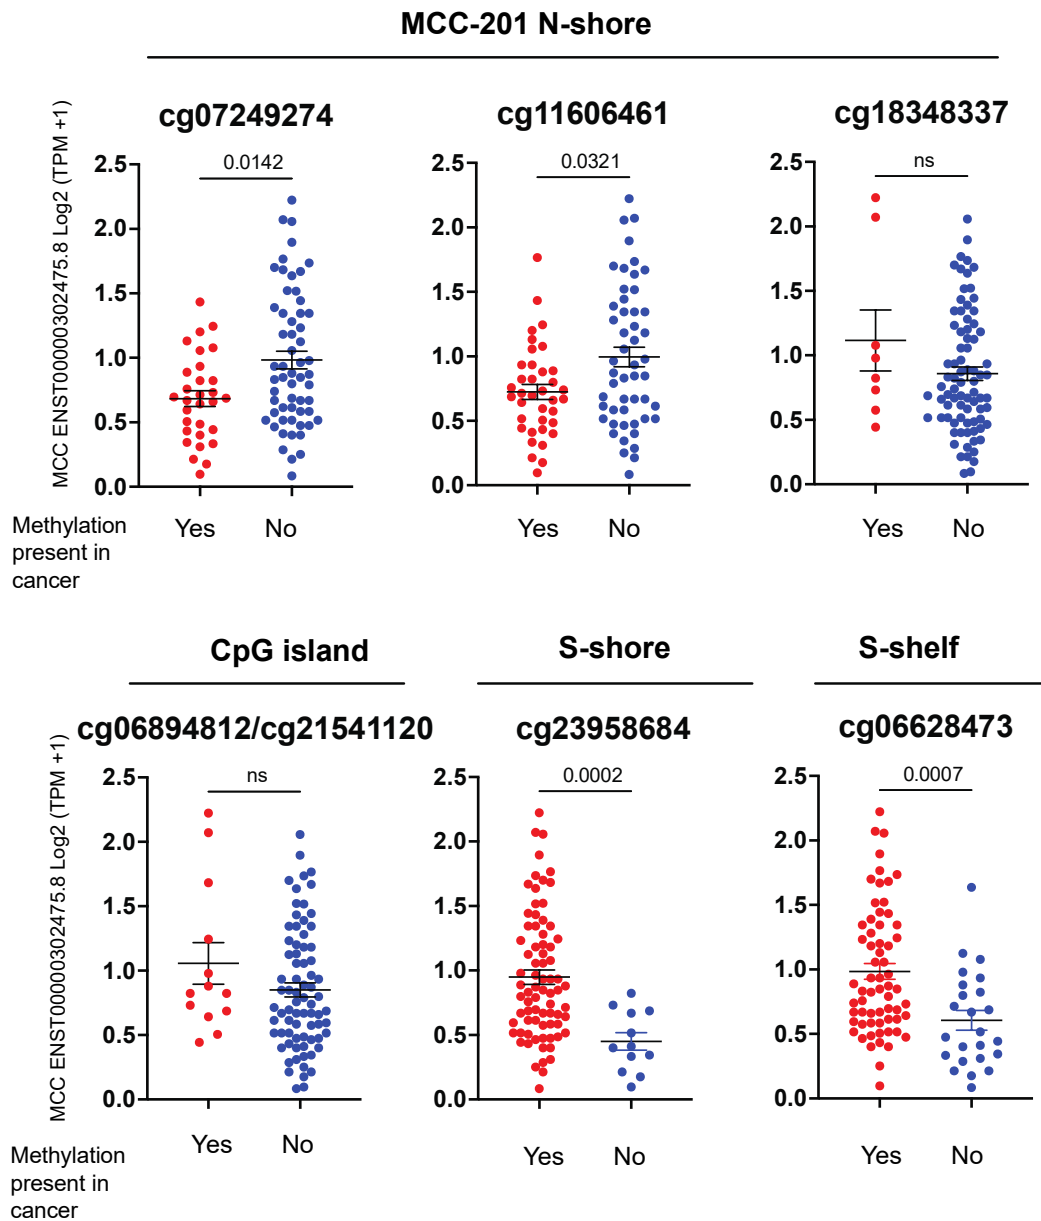

**Supplementary Figure S2.** Down-regulation of the *MCC-201* transcript in rectal cancer is associated with hypermethylation of individual CpG sites in the N-shore or hypomethylation in the S-shore/S-shelf (TCGA 2018 READ cohort). Statistical significance was determined using the unpaired Mann-Whitney test. Error bars show mean  $\pm$  SEM. Methylation beta-values  $>0.5$  were considered as hypermethylated in cancer if the matching CpG site was unmethylated in normal tissue. Methylation beta-values  $<0.4$  were considered as hypomethylated in cancer if the site was methylated in normal tissue. Detailed data are shown in Supplementary Table S2.

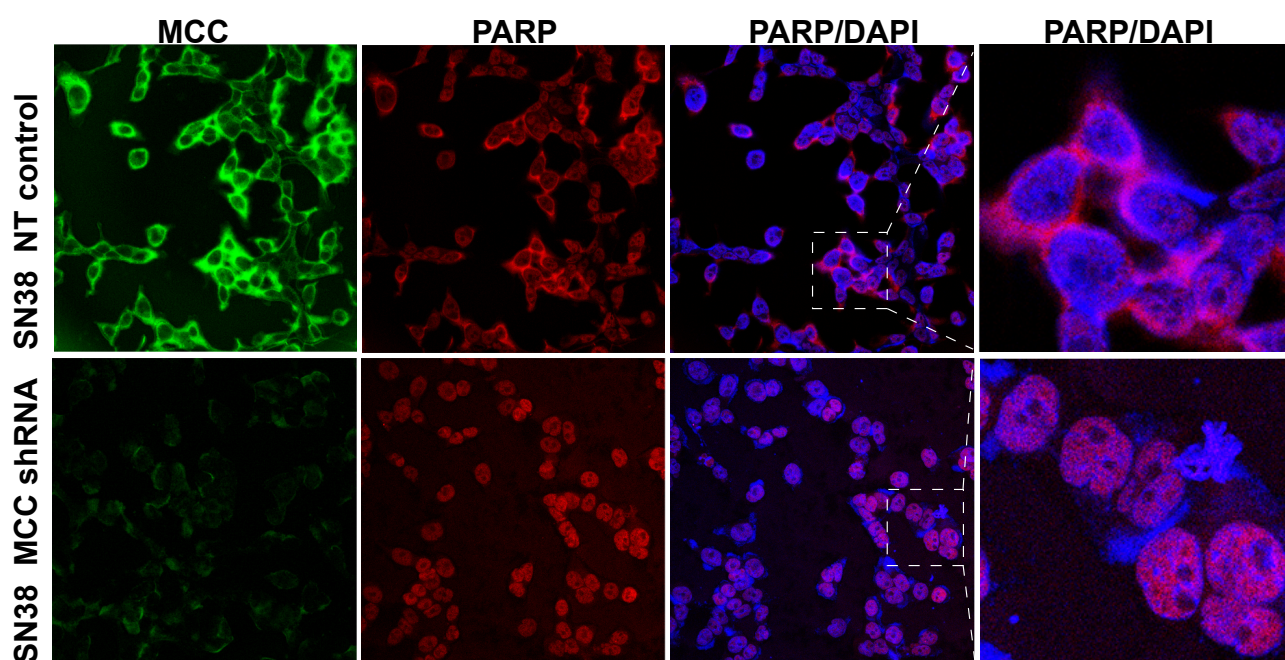

**Supplementary Figure S3.** PARP subcellular localisation following SN38/irinotecan-induced cytotoxicity in MCC knockdown (MCC shRNA) or non-targeted (NT) HCT116 cells.

HCT116 cells were treated with 1  $\mu$ M of SN38 for 2 hr. MCC was detected using a Cy3-conjugated anti-mouse antibody (green) and PARP was detected using anti-rabbit Alexa Fluor 647 (far-red) secondary antibody. The nucleus was stained with DAPI and is shown in blue.

**Supplementary Table S1.** Relative *MCC-201* mRNA expression levels of 271 TCGA colon cancers and their matching methylation beta-values for 16 CpG sites. Methylation beta-values >0.5 highlighted in orange and beta-values <0.4 highlighted in pink. Green denotes two CpG sites that are mostly hypermethylated in both cancer and normal tissue.

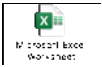

**Supplementary Table S2.** Relative *MCC-201* mRNA expression levels of 86 TCGA rectal cancers and their matching methylation beta-values for 16 CpG sites. Methylation beta-values >0.5 highlighted in orange and beta-values <0.4 highlighted in pink. Green denotes two CpG sites that are mostly hypermethylated in both cancer and normal tissue.

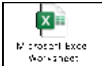

Supplement: s1 [file s1]
