# Supplementary material for: MCC Gene Silencing Is a CpG Island Methylator Phenotype-Associated Factor That Predisposes Colon Cancer Cells to Irinotecan and Olaparib
Source: MDPI journal article supplement (doi:10.3390/cancers14122859), 2022-06-09

# Western blot images

Jahan et al. *MCC* gene silencing is a CpG island methylator phenotype-associated factor that predisposes colon cancer cells to irinotecan and olaparib. *Cancers* 2022; 14

## PARP

WT1 WT2 WT1 WT2 KO1 KO2 KO1 KO2  
- - + + - - + + SN38

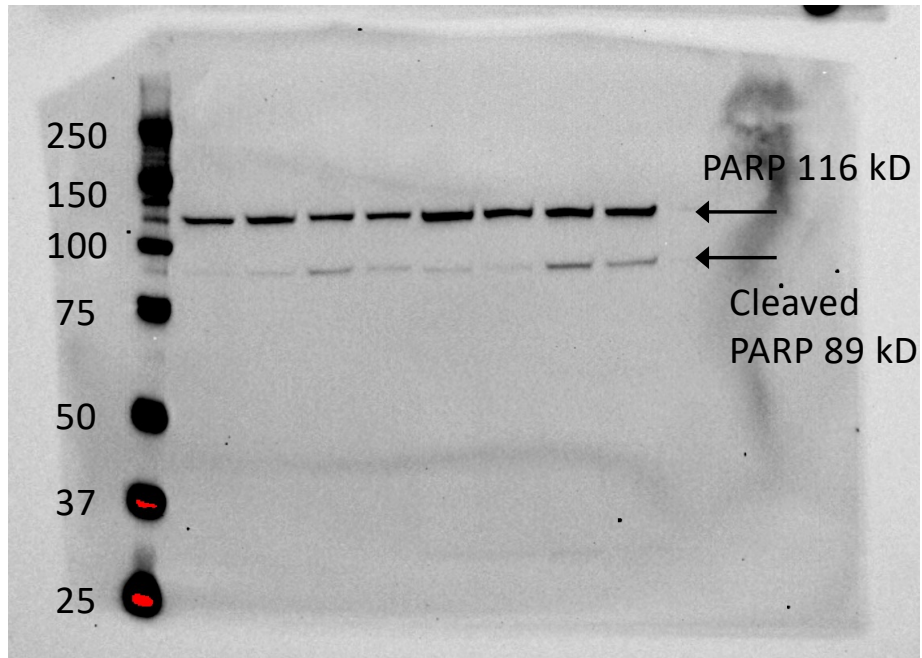

Beta-Actin

## MCC

WT1 WT2 WT1 WT2 KO1 KO2 KO1 KO2  
- - + + - - + + SN38

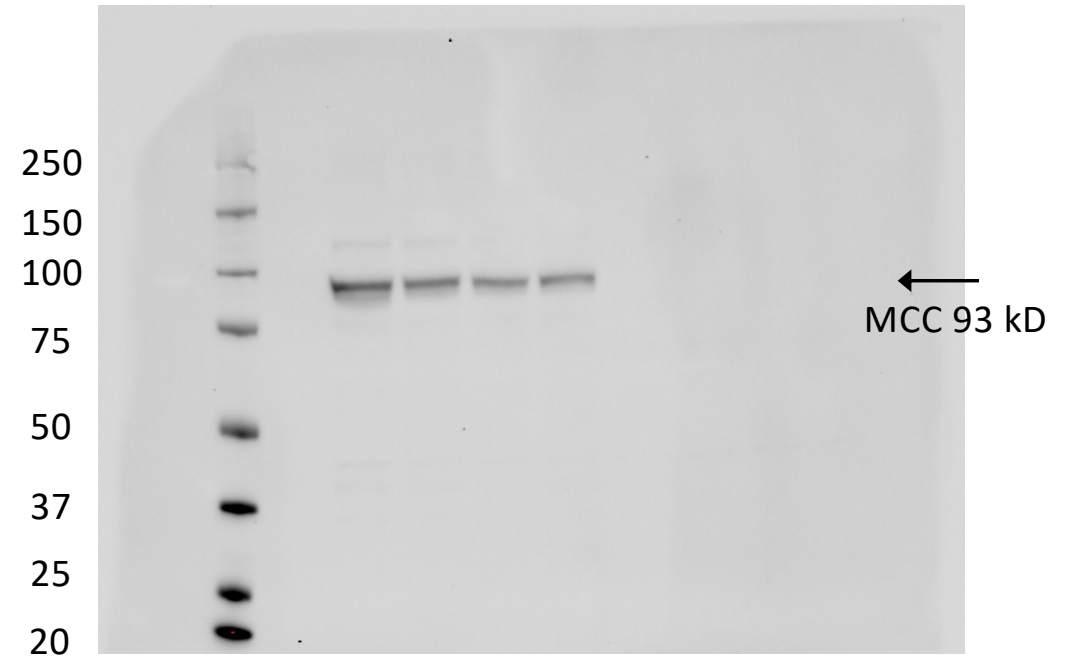

MCC 93 kD

DNA-PKcs

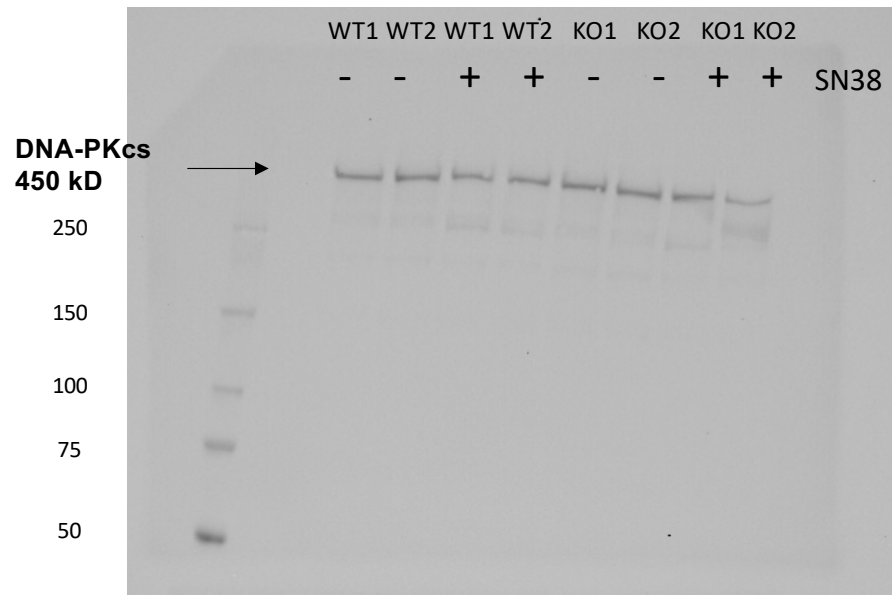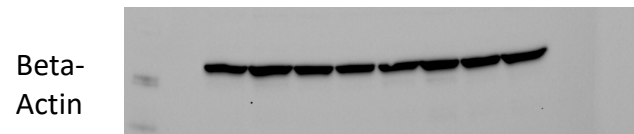

pDNA-PKcs  
S2056

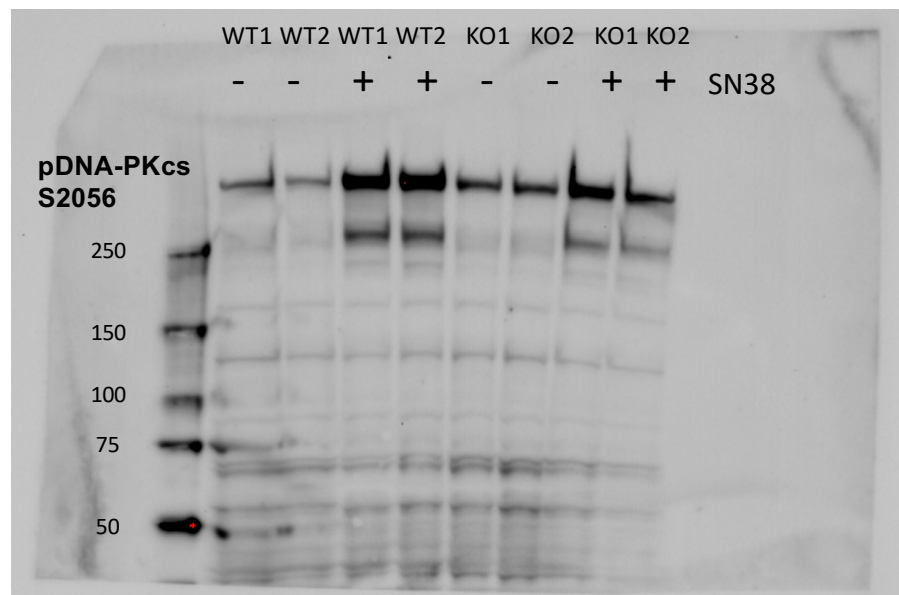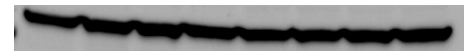

## RAD51

| WT1 | WT2 | WT1 | WT2 | KO1 | KO2 | KO1 | KO2 | SN38 |
|-----|-----|-----|-----|-----|-----|-----|-----|------|
| -   | -   | +   | +   | -   | -   | +   | +   |      |

250  
150  
100  
75  
50  
37  
25

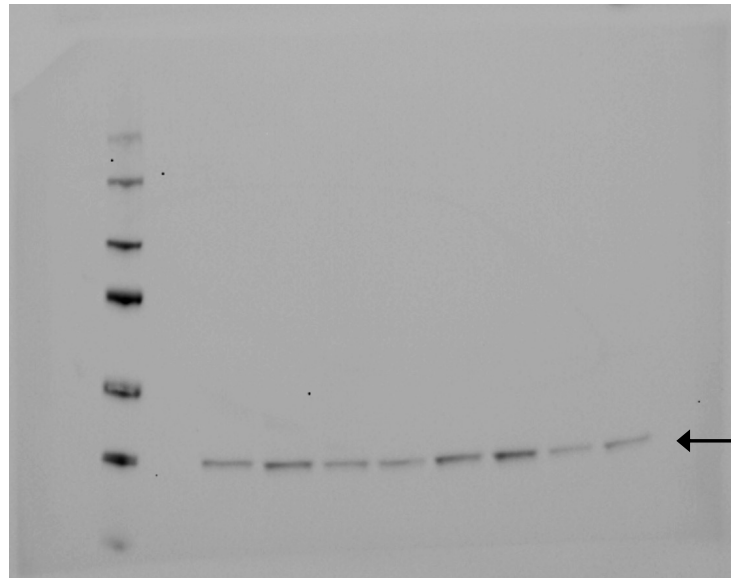

RAD51  
37 kD

Beta-  
Actin

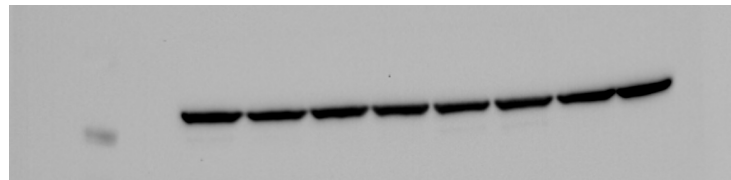

## ATR

| WT1 | WT2 | WT1 | WT2 | KO1 | KO2 | KO1 | KO2 | SN38 |
|-----|-----|-----|-----|-----|-----|-----|-----|------|
| -   | -   | +   | +   | -   | -   | +   | +   |      |

250  
150  
50

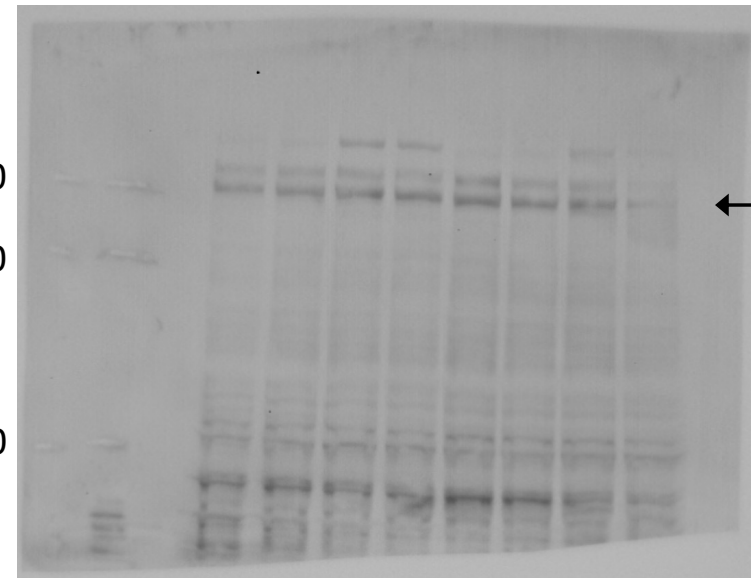

ATR  
300 kD

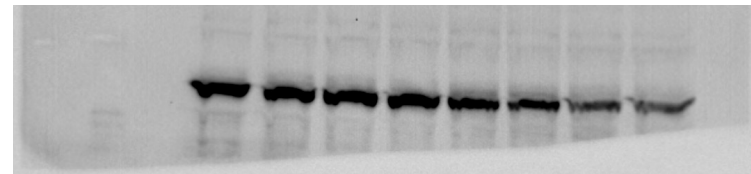

## PARP and MCC in HCT116 mouse xenografts

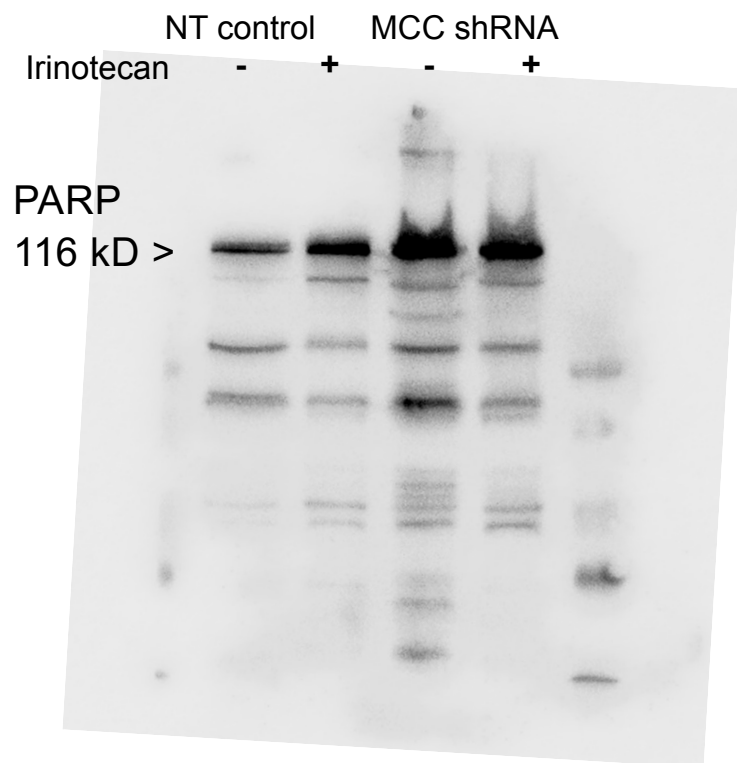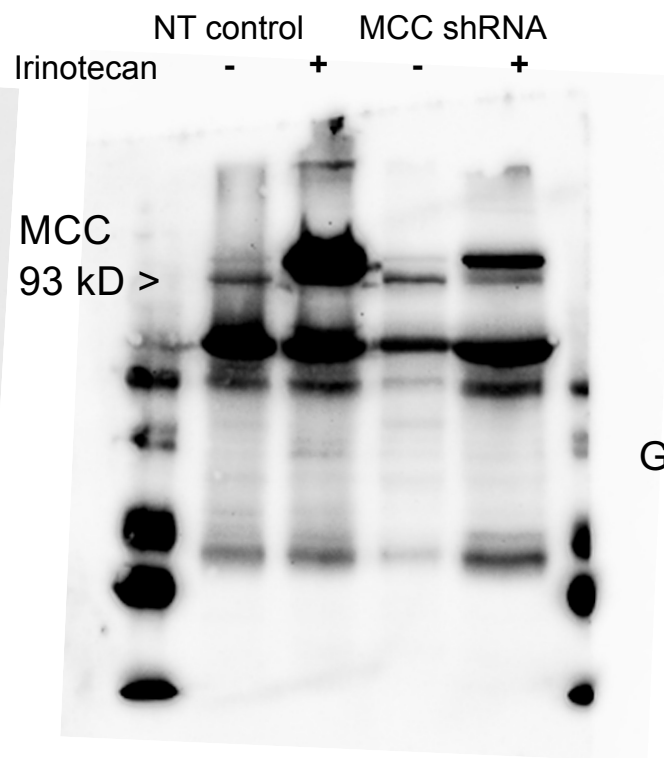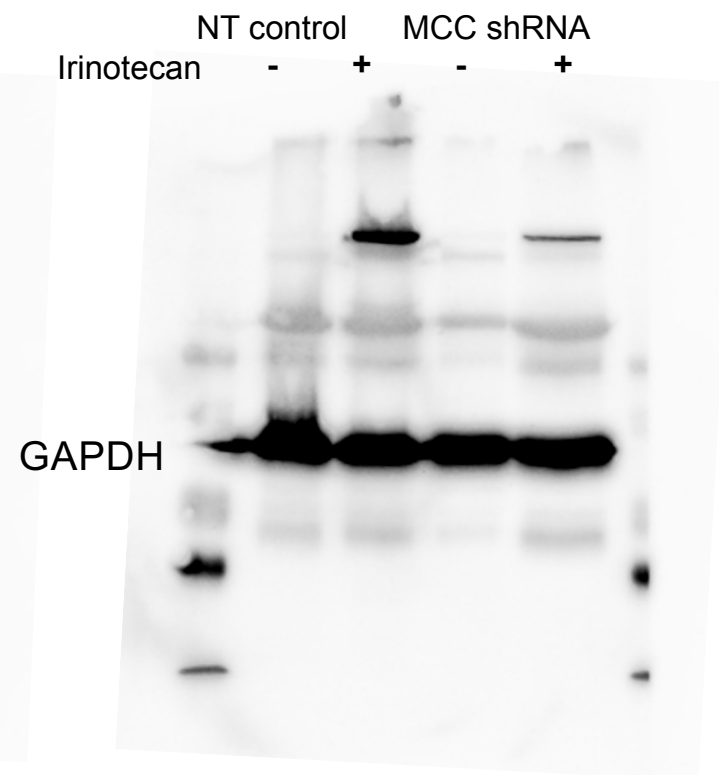

Supplement: s1 [file s1]
