# Supplementary material for: MCC Gene Silencing Is a CpG Island Methylator Phenotype-Associated Factor That Predisposes Colon Cancer Cells to Irinotecan and Olaparib
Source: Cancers (Basel). 2022 Jun 9;14(12):2859. doi: 10.3390/cancers14122859 (PMC9221012; doi:10.3390/cancers14122859)
Supplement: Supplementary file 1 [file cancers-14-02859-s001.zip]

Archive with 4 entries (4 files):
- Figure S1-3&Table S1-2.pdf
- Figure S4 Western blots.pdf
- Table S1.xlsx
- Table S2.xlsx
