# Supplementary material for: MCC Gene Silencing Is a CpG Island Methylator Phenotype-Associated Factor That Predisposes Colon Cancer Cells to Irinotecan and Olaparib
Source: Cancers (Basel). 2022 Jun 9;14(12):2859. doi: 10.3390/cancers14122859 (PMC9221012; doi:10.3390/cancers14122859)
Supplement: Supplementary file 1 [file cancers-14-02859-s001.zip › Table S1.xlsx]

## Sheet: MCC expression & methylation
COAD		N-Shelf	N-Shore	N-Shore	N-Shore	N-Shore	CpG island	CpG island	CpG island	S-Shore	S-Shore	S-Shore	S-Shore	S-Shore	S-Shore	S-Shore	S-Shelf	<- CpG island-related region
		113291749	113292722	113293868	113293907	113294344	113294528	113294716	113294926	113294980	113294987	113294998	113295114	113295293	113295355	113295829	113298739	<- Genomic coordinate GRCh38
TCGA patient ID	MCC-201 mRNA expression	cg26255261	cg02551980	cg07249274	cg11606461	cg18348337	cg06894812	cg21541120	cg15391499	cg04614008	cg24003542	cg08391321	cg07328209	cg22149359	cg06512849	cg23958684	cg06628473	<- Illumina 450K array CpG site IDs
TCGA-AZ-5403-01	0.910726	0.8918	0.8884	0.413	0.4191	0.06144	0.03231	0.03076	0.03867	0.04975	0.03153	0.03405	0.03951	0.09263	0.08269	0.6295	0.5833	No differential methylation
TCGA-DM-A28E-01	0.189063	0.8693	0.5215	0.03429	0.04076	0.09203	0.4076	0.02206	0.03724	0.04891	0.03272	0.03757	0.02973	0.06027	0.03981	0.6826	0.5906	No differential methylation
TCGA-AZ-4313-01	0.214106	0.7755	0.9041	0.01934	0.04929	0.05724	0.02997	0.027	0.0343	0.03987	0.03929	0.03999	0.03478	0.0778	0.06137	0.7103	0.4999	No differential methylation
TCGA-DM-A280-01	0.214106	0.8064	0.9205	0.342	0.2335	0.1452	0.03755	0.02095	0.03215	0.0389	0.03293	0.03985	0.03516	0.1181	0.1302	0.7664	0.6785	No differential methylation
TCGA-G4-6304-01	0.251019	0.8465	0.934	0.3337	0.2594	0.3234	0.24	0.298	0.07309	0.04857	0.05148	0.07913	0.03325	0.1442	0.1584	0.8188	0.687	No differential methylation
TCGA-G4-6307-01	0.251019	0.8414	0.6116	0.01727	0.03116	0.03565	0.02865	0.0213	0.03866	0.04892	0.02586	0.03254	0.0302	0.05175	0.03077	0.8932	0.7805	No differential methylation
TCGA-4N-A93T-01	0.28686	0.8948	0.9372	0.02841	0.03005	0.04712	0.02716	0.02871	0.03046	0.04739	0.0254	0.06198	0.03964	0.06395	0.04016	0.9012	0.9293	No differential methylation
TCGA-NH-A8F7-01	0.298665	0.711	0.9003	0.02302	0.02457	0.05587	0.03071	0.01947	0.04573	0.03643	0.02719	0.03675	0.02266	0.07243	0.03947	0.6309	0.9399	No differential methylation
TCGA-DM-A1D9-01	0.31032	0.875	0.9296	0.01722	0.04596	0.05678	0.02624	0.01992	0.03922	0.03916	0.03933	0.03533	0.024	0.05833	0.1318	0.4538	0.8334	No differential methylation
TCGA-DM-A1D7-01	0.344751	0.8986	0.8681	0.3273	0.1624	0.07636	0.3248	0.1425	0.2481	0.1213	0.1683	0.04921	0.02885	0.1058	0.04427	0.9294	0.5907	No differential methylation
TCGA-T9-A92H-01	0.356222	0.9006	0.9336	0.0274	0.09208	0.05202	0.03028	0.03714	0.1362	0.03748	0.03229	0.07549	0.03109	0.0623	0.04243	0.813	0.8793	No differential methylation
TCGA-QG-A5YV-01	0.37855	0.8554	0.9275	0.267	0.2414	0.1683	0.2226	0.07115	0.03632	0.0588	0.03548	0.06209	0.03192	0.06753	0.04243	0.5573	0.7164	No differential methylation
TCGA-F4-6808-01	0.38957	0.5971	0.8492	0.02171	0.03599	0.06155	0.04914	0.02083	0.03764	0.05501	0.042	0.04026	0.03449	0.07508	0.06362	0.8739	0.4754	No differential methylation
TCGA-G4-6315-01	0.454043	0.7672	0.9071	0.2633	0.2906	0.05204	0.3862	0.01863	0.03702	0.0389	0.02493	0.0303	0.02696	0.07691	0.03532	0.5424	0.5586	No differential methylation
TCGA-CA-6715-01	0.464706	0.6083	0.9419	0.3922	0.05418	0.05934	0.02504	0.02155	0.04658	0.05343	0.03717	0.03083	0.04703	0.1014	0.05004	0.9221	0.6096	No differential methylation
TCGA-D5-6530-01	0.505923	0.8546	0.82	0.3071	0.3735	0.4067	0.1549	0.06138	0.1582	0.1158	0.1124	0.03811	0.03439	0.1383	0.131	0.6474	0.5819	No differential methylation
TCGA-A6-6652-01	0.546019	0.8606	0.9512	0.04114	0.1332	0.105	0.026	0.02293	0.02324	0.0539	0.04377	0.06305	0.03982	0.05101	0.07454	0.7236	0.6018	No differential methylation
TCGA-D5-6932-01	0.659921	0.8606	0.8897	0.066	0.3827	0.0781	0.03564	0.05213	0.03705	0.05027	0.0435	0.1008	0.03746	0.09747	0.0724	0.8464	0.7216	No differential methylation
TCGA-DM-A285-01	0.669016	0.8389	0.8438	0.06993	0.192	0.3857	0.3652	0.2969	0.1954	0.1936	0.2469	0.04806	0.03566	0.2969	0.1986	0.7565	0.4639	No differential methylation
TCGA-A6-6141-01	0.704867	0.7592	0.9299	0.3095	0.3311	0.07915	0.05341	0.01986	0.03505	0.04414	0.04108	0.04415	0.05358	0.09329	0.1273	0.6011	0.4595	No differential methylation
TCGA-CM-6674-01	0.739854	0.9096	0.9356	0.03046	0.03631	0.09089	0.04539	0.02509	0.05046	0.08548	0.03238	0.03328	0.03856	0.1416	0.1081	0.8894	0.6792	No differential methylation
TCGA-AD-6963-01	0.74845	0.7166	0.8904	0.3096	0.34	0.04866	0.03285	0.03283	0.04077	0.05331	0.04211	0.06638	0.03632	0.1253	0.1084	0.8045	0.6284	No differential methylation
TCGA-NH-A8F8-01	0.74845	0.8476	0.9112	0.2665	0.1127	0.08646	0.3425	0.2273	0.08635	0.04073	0.03469	0.03304	0.0241	0.1759	0.2293	0.4149	0.5597	No differential methylation
TCGA-CM-6164-01	0.757041	0.6257	0.8527	0.4187	0.1748	0.05463	0.04766	0.0269	0.03213	0.04659	0.03554	0.034	0.04239	0.1177	0.1193	0.8866	0.5338	No differential methylation
TCGA-D5-6539-01	0.799068	0.7998	0.9282	0.2308	0.1974	0.1981	0.2569	0.2499	0.04714	0.0472	0.03779	0.03407	0.03139	0.08608	0.05555	0.743	0.7393	No differential methylation
TCGA-D5-6929-01	0.807361	0.5542	0.8569	0.03805	0.07101	0.04907	0.04987	0.03879	0.04	0.05477	0.04118	0.05165	0.0572	0.1205	0.1301	0.7568	0.4954	No differential methylation
TCGA-D5-6541-01	0.83188	0.7458	0.9316	0.3035	0.2475	0.2434	0.02603	0.01881	0.03835	0.03858	0.02876	0.02854	0.02914	0.08382	0.07777	0.9008	0.4126	No differential methylation
TCGA-A6-6648-01	0.839938	0.9159	0.8788	0.2099	0.1523	0.06678	0.02182	0.024	0.02271	0.04503	0.03672	0.047	0.03406	0.04584	0.05255	0.7592	0.5425	No differential methylation
TCGA-AU-6004-01	0.848008	0.7992	0.9115	0.446	0.3933	0.2448	0.2938	0.3799	0.3208	0.299	0.3255	0.2276	0.03635	0.2187	0.3486	0.8813	0.5656	No differential methylation
TCGA-AZ-4684-01	0.848008	0.5969	0.8882	0.2644	0.05391	0.06144	0.1123	0.03289	0.03748	0.04358	0.04022	0.06523	0.03404	0.0731	0.07933	0.5597	0.4099	No differential methylation
TCGA-D5-5539-01	0.848008	0.487	0.9336	0.3473	0.4465	0.0743	0.03702	0.02215	0.03143	0.04068	0.03056	0.03785	0.0314	0.07506	0.1191	0.9076	0.5139	No differential methylation
TCGA-AA-3511-01	0.863959	0.753	0.9389	0.4395	0.4221	0.09975	0.1777	0.2271	0.08088	0.05264	0.03543	0.028	0.03252	0.3528	0.05713	0.7417	0.4651	No differential methylation
TCGA-D5-6533-01	0.879716	0.2287	0.9341	0.4117	0.3476	0.02834	0.02813	0.01704	0.04069	0.04976	0.0264	0.05762	0.02712	0.06118	0.06131	0.7364	0.6413	No differential methylation
TCGA-D5-5541-01	0.887511	0.8469	0.9299	0.3715	0.4057	0.1081	0.04895	0.02608	0.0406	0.04988	0.0366	0.0344	0.04038	0.0803	0.07019	0.7167	0.6158	No differential methylation
TCGA-AA-3713-01	0.895309	0.404	0.888	0.1673	0.1709	0.4048	0.4419	0.4393	0.4742	0.2911	0.2666	0.1093	0.03528	0.1169	0.4677	0.7337	0.616	No differential methylation
TCGA-D5-6930-01	0.895309	0.8949	0.8954	0.4916	0.4168	0.4174	0.421	0.4581	0.3529	0.3367	0.3826	0.3573	0.1915	0.3528	0.4633	0.9058	0.5977	No differential methylation
TCGA-AU-3779-01	0.918387	0.8269	0.868	0.2502	0.2093	0.06403	0.02878	0.02187	0.03789	0.04358	0.03055	0.03155	0.02349	0.07164	0.06009	0.6283	0.7488	No differential methylation
TCGA-AA-3712-01	0.978174	0.6796	0.9033	0.2622	0.03076	0.05036	0.02699	0.02304	0.03252	0.04404	0.0257	0.03005	0.02505	0.07349	0.06029	0.9093	0.6482	No differential methylation
TCGA-AD-6964-01	0.999979	0.8568	0.8938	0.09376	0.04067	0.04926	0.03886	0.03695	0.04041	0.04645	0.03602	0.04596	0.0556	0.107	0.1613	0.8361	0.8569	No differential methylation
TCGA-CM-5349-01	0.999979	0.6983	0.9081	0.4513	0.4634	0.255	0.3214	0.3616	0.3401	0.3363	0.3669	0.2017	0.03268	0.08333	0.1099	0.8799	0.5004	No differential methylation
TCGA-CM-6170-01	0.999979	0.9134	0.8221	0.0404	0.05603	0.04905	0.03392	0.02742	0.03627	0.05159	0.03404	0.03186	0.02763	0.06835	0.07251	0.6453	0.9027	No differential methylation
TCGA-A6-6782-01	1.0072	0.889	0.9248	0.3884	0.4066	0.06037	0.05523	0.01904	0.04814	0.06005	0.03127	0.03843	0.04389	0.09185	0.112	0.833	0.5925	No differential methylation
TCGA-AZ-6603-01	1.07726	0.8274	0.9088	0.02471	0.02947	0.05226	0.05643	0.01874	0.03839	0.03877	0.04177	0.03074	0.03164	0.06828	0.04204	0.8516	0.4135	No differential methylation
TCGA-CM-5344-01	1.07726	0.7691	0.8851	0.02876	0.03729	0.05605	0.02751	0.02014	0.03079	0.03688	0.04308	0.03069	0.02845	0.05175	0.04389	0.7757	0.5211	No differential methylation
TCGA-CK-4948-01	1.08407	0.3903	0.7837	0.4434	0.2956	0.1582	0.02975	0.02338	0.03827	0.0451	0.02907	0.0261	0.0389	0.1088	0.09355	0.6734	0.4443	No differential methylation
TCGA-G4-6311-01	1.15703	0.611	0.7452	0.3407	0.3552	0.04702	0.03376	0.02125	0.04598	0.06137	0.03313	0.03056	0.03207	0.08667	0.09104	0.8854	0.5515	No differential methylation
TCGA-CK-4947-01	1.18905	0.7061	0.9365	0.3382	0.3451	0.111	0.4006	0.08947	0.06204	0.05812	0.0297	0.03353	0.03355	0.09968	0.09583	0.6201	0.4186	No differential methylation
TCGA-A6-5664-01	1.24487	0.8853	0.8627	0.2912	0.2092	0.2299	0.2899	0.1989	0.1503	0.06684	0.03891	0.04449	0.1169	0.1482	0.1416	0.8606	0.6586	No differential methylation
TCGA-F4-6809-01	1.25095	0.8341	0.9385	0.3205	0.1743	0.1415	0.1257	0.02714	0.05215	0.06646	0.04164	0.03362	0.04929	0.1821	0.1558	0.8242	0.6179	No differential methylation
TCGA-A6-2685-01	1.257	0.8525	0.8212	0.3025	0.3883	0.04652	0.03142	0.02602	0.04027	0.05371	0.03448	0.03937	0.03697	0.09396	0.06088	0.8545	0.4931	No differential methylation
TCGA-F4-6460-01	1.257	0.6887	0.917	0.08036	0.05715	0.07042	0.03868	0.02929	0.03398	0.05697	0.04082	0.0504	0.03741	0.1165	0.04947	0.6431	0.7331	No differential methylation
TCGA-CK-6748-01	1.26306	0.8812	0.9079	0.2177	0.02736	0.05534	0.04093	0.02838	0.05647	0.04343	0.04124	0.0321	0.03411	0.07162	0.05957	0.5673	0.798	No differential methylation
TCGA-D5-6924-01	1.26306	0.8706	0.8943	0.3056	0.1597	0.04605	0.03171	0.03492	0.0571	0.0474	0.03354	0.0606	0.02669	0.1478	0.1005	0.5996	0.871	No differential methylation
TCGA-CA-6719-01	1.275	0.8703	0.885	0.3506	0.4077	0.07466	0.04001	0.03505	0.03249	0.0608	0.04292	0.06156	0.03559	0.131	0.08081	0.6057	0.8096	No differential methylation
TCGA-CM-6163-01	1.28094	0.6075	0.927	0.4195	0.06686	0.06772	0.0371	0.03477	0.03309	0.04129	0.03991	0.03808	0.0301	0.09656	0.09422	0.6134	0.5056	No differential methylation
TCGA-D5-6928-01	1.29275	0.7681	0.922	0.1532	0.1965	0.2854	0.3616	0.351	0.3907	0.1496	0.2182	0.07272	0.04315	0.2865	0.2926	0.8012	0.6089	No differential methylation
TCGA-F4-6459-01	1.31036	0.7561	0.9111	0.169	0.1234	0.05953	0.03599	0.03539	0.02762	0.06453	0.05179	0.06979	0.03712	0.159	0.05957	0.7364	0.7081	No differential methylation
TCGA-A6-2675-01	1.3505	0.7347	0.8691	0.04836	0.04279	0.04786	0.03769	0.02146	0.0339	0.03712	0.02847	0.04003	0.02715	0.07361	0.07	0.8513	0.5644	No differential methylation
TCGA-D5-6529-01	1.39509	0.7981	0.9405	0.4701	0.4638	0.05439	0.1071	0.02247	0.03241	0.05811	0.03986	0.04603	0.05863	0.1251	0.1346	0.8916	0.7423	No differential methylation
TCGA-A6-5657-01	1.40055	0.9073	0.9341	0.3614	0.3854	0.2868	0.3207	0.06989	0.2787	0.1542	0.1211	0.04431	0.04364	0.1795	0.1468	0.8926	0.6634	No differential methylation
TCGA-G4-6627-01	1.40055	0.8899	0.8987	0.344	0.371	0.2103	0.3191	0.2669	0.402	0.215	0.2879	0.1413	0.03376	0.2191	0.2376	0.8762	0.625	No differential methylation
TCGA-A6-6142-01	1.41146	0.627	0.7294	0.01749	0.03953	0.04874	0.0191	0.02613	0.02376	0.03996	0.04565	0.05975	0.03864	0.07073	0.07659	0.7723	0.4828	No differential methylation
TCGA-G4-6303-01	1.42762	0.8191	0.7243	0.03018	0.03455	0.0509	0.0466	0.0218	0.02993	0.0478	0.0367	0.06375	0.02777	0.04652	0.04044	0.5154	0.6494	No differential methylation
TCGA-F4-6805-01	1.47509	0.7947	0.9202	0.4491	0.3297	0.2524	0.1311	0.02652	0.04185	0.04951	0.03845	0.04427	0.03845	0.09765	0.0894	0.807	0.7443	No differential methylation
TCGA-A6-2684-01	1.4991	0.8902	0.908	0.2762	0.04472	0.0529	0.03022	0.03105	0.03677	0.04016	0.0388	0.05602	0.03482	0.06317	0.07576	0.8881	0.6982	No differential methylation
TCGA-F4-6807-01	1.52607	0.8673	0.9222	0.3332	0.2839	0.06422	0.02894	0.02149	0.04248	0.05059	0.03192	0.02765	0.05548	0.111	0.1215	0.7508	0.5107	No differential methylation
TCGA-A6-A565-01	1.57044	0.9164	0.9196	0.1953	0.1005	0.06243	0.03505	0.02664	0.03093	0.03988	0.02889	0.03431	0.0312	0.1082	0.106	0.8665	0.7916	No differential methylation
TCGA-CA-6717-01	1.58515	0.8167	0.9212	0.4418	0.3732	0.1967	0.1706	0.02674	0.05393	0.05875	0.0353	0.0317	0.04098	0.1443	0.1254	0.8381	0.791	No differential methylation
TCGA-F4-6569-01	1.63696	0.8938	0.8289	0.3495	0.3455	0.2972	0.4442	0.1744	0.4428	0.2175	0.2782	0.0716	0.0431	0.2395	0.08864	0.8614	0.5679	No differential methylation
TCGA-G4-6297-01	1.66424	0.5479	0.9315	0.3857	0.2654	0.05777	0.1301	0.0285	0.04052	0.0478	0.03486	0.04116	0.03703	0.0881	0.08588	0.5293	0.5898	No differential methylation
TCGA-A6-6654-01	1.73976	0.7515	0.9254	0.2138	0.1158	0.4338	0.338	0.2911	0.04478	0.05234	0.04685	0.04047	0.03718	0.1279	0.1302	0.8499	0.8054	No differential methylation
TCGA-CM-6168-01	1.74397	0.9077	0.9133	0.314	0.3381	0.228	0.042	0.02493	0.04393	0.04157	0.03295	0.04396	0.03046	0.08561	0.1529	0.8247	0.6692	No differential methylation
TCGA-F4-6704-01	1.77003	0.8731	0.89	0.255	0.2374	0.06669	0.03872	0.02424	0.04691	0.06196	0.04792	0.039	0.03703	0.1021	0.1383	0.8729	0.8554	No differential methylation
TCGA-A6-3810-01	1.77215	0.7741	0.8574	0.4631	0.3629	0.06749	0.09795	0.02656	0.03246	0.03709	0.03097	0.0435	0.02501	0.05304	0.0682	0.724	0.8935	No differential methylation
TCGA-AA-3489-01	1.80342	0.9205	0.9328	0.3533	0.3698	0.0609	0.07038	0.01793	0.03992	0.04736	0.03609	0.02338	0.03483	0.1354	0.1191	0.7689	0.8316	No differential methylation
TCGA-A6-6651-01	1.82777	0.8812	0.906	0.04781	0.03335	0.04935	0.03895	0.02039	0.06022	0.06132	0.03675	0.02651	0.03184	0.1163	0.1074	0.8615	0.7602	No differential methylation
TCGA-AZ-4323-01	1.87187	0.8546	0.9061	0.02774	0.03654	0.06362	0.0627	0.03149	0.06739	0.06238	0.03524	0.02474	0.03136	0.166	0.155	0.8892	0.8509	No differential methylation
TCGA-AZ-6605-01	1.8755	0.8231	0.8733	0.07565	0.07288	0.05523	0.04465	0.02945	0.0372	0.06481	0.04992	0.04285	0.03909	0.1185	0.09833	0.8127	0.6509	No differential methylation
TCGA-G4-6302-01	1.90692	0.8247	0.8585	0.2237	0.2001	0.197	0.2141	0.3236	0.2949	0.1993	0.2053	0.1092	0.07931	0.1955	0.2062	0.8975	0.7409	No differential methylation
TCGA-5M-AAT6-01	1.91868	0.8323	0.9044	0.1489	0.1023	0.04357	0.03541	0.02027	0.03826	0.03808	0.0338	0.03265	0.02648	0.07512	0.09066	0.6819	0.877	No differential methylation
TCGA-A6-6781-01	1.95489	0.9059	0.9343	0.4887	0.4065	0.07911	0.04333	0.03428	0.05241	0.05799	0.03702	0.04256	0.03609	0.1564	0.1228	0.9141	0.9112	No differential methylation
TCGA-CM-6162-01	2.06314	0.7593	0.9083	0.02877	0.03288	0.0716	0.03419	0.02289	0.03206	0.04325	0.03792	0.03476	0.02851	0.098	0.1287	0.7527	0.8227	No differential methylation
TCGA-AY-6196-01	2.1275	0.6747	0.9259	0.3549	0.3431	0.2794	0.4541	0.2808	0.04685	0.05019	0.03217	0.02938	0.03334	0.1014	0.1244	0.7378	0.5037	No differential methylation
TCGA-D5-6534-01	2.14759	0.8764	0.8412	0.2386	0.15	0.05852	0.2632	0.3304	0.279	0.03991	0.04736	0.05019	0.03078	0.1147	0.1698	0.9054	0.7265	No differential methylation
TCGA-CM-6167-01	2.33045	0.8952	0.867	0.0712	0.05453	0.06686	0.03472	0.02017	0.03112	0.0424	0.03285	0.03821	0.03134	0.09695	0.08635	0.9048	0.7835	No differential methylation
TCGA-F4-6703-01	2.58978	0.8918	0.9006	0.178	0.09129	0.06822	0.1456	0.0252	0.06289	0.05566	0.03584	0.03953	0.04422	0.1773	0.1884	0.8817	0.7344	No differential methylation
TCGA-WS-AB45-01	2.63916	0.8614	0.795	0.2671	0.2181	0.212	0.2455	0.4183	0.3774	0.2751	0.301	0.2691	0.0292	0.2872	0.3398	0.8664	0.918	No differential methylation
TCGA-DM-A28K-01	0.226499	0.8985	0.9176	0.06661	0.2009	0.07609	0.03792	0.03257	0.03446	0.05588	0.03972	0.05251	0.02943	0.06143	0.05742	0.8903	0.3597	Shore/shelf hypomethylation only
TCGA-DM-A288-01	0.31032	0.9176	0.9538	0.4425	0.4183	0.218	0.04389	0.1786	0.0416	0.05578	0.03257	0.04851	0.04215	0.0572	0.0497	0.8638	0.376	Shore/shelf hypomethylation only
TCGA-D5-6532-01	0.516088	0.5884	0.9393	0.3948	0.4385	0.3621	0.3739	0.4958	0.2127	0.1507	0.131	0.03824	0.02588	0.07013	0.07095	0.9136	0.2175	Shore/shelf hypomethylation only
TCGA-A6-6140-01	0.526115	0.8807	0.9476	0.04603	0.05133	0.06868	0.024	0.03024	0.02435	0.05585	0.04715	0.06389	0.04612	0.04434	0.07943	0.3971	0.4497	Shore/shelf hypomethylation only
TCGA-AM-5820-01	0.57538	0.3144	0.9242	0.02727	0.04125	0.08695	0.125	0.02581	0.04358	0.05639	0.03429	0.03239	0.02835	0.05623	0.04129	0.6498	0.3331	Shore/shelf hypomethylation only
TCGA-AA-3506-01	0.59455	0.782	0.8849	0.3469	0.09389	0.04891	0.0341	0.02257	0.04692	0.04581	0.03727	0.05218	0.03808	0.09121	0.06051	0.3072	0.398	Shore/shelf hypomethylation only
TCGA-AY-A8YK-01	0.59455	0.7972	0.8877	0.04113	0.0339	0.04176	0.03304	0.01881	0.03992	0.03665	0.03509	0.0403	0.02812	0.05368	0.04184	0.3726	0.7728	Shore/shelf hypomethylation only
TCGA-NH-A5IV-01	0.59455	0.7948	0.9399	0.3753	0.2932	0.08343	0.06222	0.0406	0.06436	0.04234	0.02972	0.08035	0.02819	0.07859	0.04131	0.2304	0.1951	Shore/shelf hypomethylation only
TCGA-D5-6536-01	0.604087	0.6548	0.8814	0.2721	0.335	0.03711	0.05404	0.06809	0.2774	0.0977	0.03704	0.09227	0.04939	0.08303	0.03458	0.2401	0.9062	Shore/shelf hypomethylation only
TCGA-A6-5667-01	0.757041	0.716	0.9036	0.3121	0.4429	0.08051	0.1676	0.02382	0.04158	0.04089	0.03825	0.03635	0.04068	0.0454	0.05211	0.8717	0.3184	Shore/shelf hypomethylation only
TCGA-D5-5538-01	0.782421	0.3746	0.9396	0.1408	0.2688	0.4005	0.4196	0.03859	0.07386	0.06666	0.03976	0.04647	0.03421	0.1638	0.07132	0.3938	0.36	Shore/shelf hypomethylation only
TCGA-CM-5868-01	0.790754	0.8302	0.7735	0.08573	0.2741	0.1064	0.2191	0.02393	0.03505	0.0415	0.04014	0.0343	0.03307	0.09031	0.08372	0.848	0.3875	Shore/shelf hypomethylation only
TCGA-CA-5797-01	0.807361	0.748	0.6719	0.01974	0.03051	0.04009	0.0351	0.02743	0.0469	0.05084	0.03178	0.03401	0.0318	0.1439	0.07355	0.841	0.3488	Shore/shelf hypomethylation only
TCGA-A6-A567-01	0.839938	0.661	0.9108	0.2394	0.04381	0.3129	0.4342	0.2849	0.04022	0.03977	0.02787	0.04547	0.03682	0.06154	0.05637	0.3753	0.536	Shore/shelf hypomethylation only
TCGA-CK-5912-01	0.910726	0.8579	0.9187	0.0316	0.03628	0.07352	0.03375	0.02952	0.03119	0.05126	0.04028	0.06286	0.03008	0.05223	0.04563	0.2906	0.9055	Shore/shelf hypomethylation only
TCGA-D5-6898-01	1.18905	0.7782	0.9343	0.04135	0.03753	0.2979	0.06048	0.03562	0.0487	0.05118	0.03833	0.04942	0.0329	0.1144	0.0791	0.3422	0.3545	Shore/shelf hypomethylation only
TCGA-D5-6538-01	0.38957	0.4039	0.9307	0.8638	0.9273	0.8015	0.8142	0.9105	0.3508	0.3848	0.7271	0.5252	0.04582	0.2624	0.04182	0.5782	0.1132	Shore/shelf hypomethylation with CpG island hypermethylation
TCGA-AY-A71X-01	0.201684	0.7709	0.9045	0.8287	0.8677	0.7985	0.7119	0.6958	0.3985	0.1095	0.2822	0.2303	0.04459	0.1322	0.04742	0.3145	0.1255	Shore/shelf hypomethylation with CpG island hypermethylation
TCGA-G4-6322-01	0.475017	0.1587	0.5993	0.02397	0.1543	0.6955	0.7084	0.6086	0.4708	0.4424	0.4595	0.1072	0.06659	0.4569	0.4842	0.1947	0.1355	Shore/shelf hypomethylation with CpG island hypermethylation
TCGA-CM-6675-01	0.722454	0.5057	0.4569	0.5207	0.5655	0.6914	0.6889	0.8258	0.7776	0.8114	0.8857	0.8721	0.1223	0.227	0.1039	0.6076	0.1881	Shore/shelf hypomethylation with CpG island hypermethylation
TCGA-D5-6531-01	0.62293	0.2897	0.9485	0.6995	0.7816	0.718	0.5742	0.2473	0.2529	0.1815	0.1341	0.07336	0.04127	0.3793	0.3096	0.665	0.1991	Shore/shelf hypomethylation with CpG island hypermethylation
TCGA-AD-6965-01	0.76554	0.8093	0.8636	0.3166	0.3575	0.3688	0.5464	0.03604	0.0373	0.04991	0.04703	0.07375	0.03182	0.05838	0.06125	0.8092	0.2048	Shore/shelf hypomethylation with CpG island hypermethylation
TCGA-A6-5666-01	0.226499	0.8638	0.7999	0.03218	0.06122	0.08176	0.6349	0.4174	0.05893	0.0505	0.04071	0.05339	0.0697	0.2581	0.06031	0.8112	0.2106	Shore/shelf hypomethylation with CpG island hypermethylation
TCGA-DM-A28M-01	0.150597	0.6814	0.9585	0.747	0.785	0.7471	0.6789	0.8032	0.7126	0.7934	0.803	0.8785	0.05522	0.6631	0.7613	0.4463	0.2129	Shore/shelf hypomethylation with CpG island hypermethylation
TCGA-G4-6320-01	0.321976	0.7087	0.8995	0.7996	0.7945	0.7165	0.5977	0.6338	0.4663	0.5887	0.6173	0.5961	0.1688	0.4835	0.207	0.6407	0.218	Shore/shelf hypomethylation with CpG island hypermethylation
TCGA-CA-6716-01	1.08407	0.3716	0.9372	0.8107	0.8866	0.8064	0.7435	0.8545	0.4541	0.2571	0.4357	0.3509	0.04124	0.3671	0.369	0.92	0.2356	Shore/shelf hypomethylation with CpG island hypermethylation
TCGA-AA-3492-01	0.400624	0.843	0.9182	0.728	0.812	0.6749	0.6476	0.7911	0.6044	0.7761	0.7833	0.8655	0.4709	0.7172	0.7848	0.8831	0.2378	Shore/shelf hypomethylation with CpG island hypermethylation
TCGA-CK-6746-01	0.238777	0.208	0.7909	0.7636	0.8539	0.773	0.7437	0.8429	0.5209	0.5595	0.4756	0.284	0.04251	0.1056	0.07196	0.3539	0.244	Shore/shelf hypomethylation with CpG island hypermethylation
TCGA-DM-A0X9-01	0.516088	0.3119	0.9252	0.6906	0.7457	0.7084	0.6338	0.7941	0.3035	0.5152	0.5187	0.4607	0.03765	0.09867	0.1082	0.3057	0.2543	Shore/shelf hypomethylation with CpG island hypermethylation
TCGA-AZ-5407-01	0.26299	0.7615	0.9325	0.6478	0.6811	0.6627	0.5811	0.1633	0.2187	0.1821	0.1692	0.05347	0.0447	0.1566	0.2011	0.7583	0.2557	Shore/shelf hypomethylation with CpG island hypermethylation
TCGA-A6-A56B-01	0.887511	0.8241	0.9362	0.3407	0.5201	0.4321	0.6254	0.7776	0.3765	0.2498	0.3612	0.3921	0.09915	0.08826	0.1118	0.911	0.3049	Shore/shelf hypomethylation with CpG island hypermethylation
TCGA-A6-5656-01	1.68554	0.8503	0.9407	0.7485	0.7513	0.7249	0.6899	0.5027	0.3387	0.07472	0.04742	0.03593	0.04515	0.42	0.08367	0.8926	0.3062	Shore/shelf hypomethylation with CpG island hypermethylation
TCGA-D5-5537-01	0.879716	0.8962	0.9324	0.433	0.5317	0.4863	0.621	0.5963	0.4821	0.5	0.634	0.6107	0.03028	0.1049	0.4418	0.3605	0.3075	Shore/shelf hypomethylation with CpG island hypermethylation
TCGA-F4-6806-01	0.659921	0.8672	0.909	0.6114	0.7151	0.6309	0.5921	0.7348	0.6114	0.5037	0.6353	0.517	0.2321	0.3533	0.3867	0.5915	0.3375	Shore/shelf hypomethylation with CpG island hypermethylation
TCGA-CM-4744-01	0.150597	0.3674	0.9261	0.5063	0.5552	0.4013	0.5254	0.388	0.28	0.1072	0.09298	0.0488	0.04446	0.2004	0.1271	0.354	0.342	Shore/shelf hypomethylation with CpG island hypermethylation
TCGA-D5-6540-01	0.76554	0.4972	0.9243	0.6211	0.6114	0.6428	0.6148	0.5053	0.4605	0.4817	0.4951	0.4368	0.07547	0.1455	0.07016	0.8855	0.3445	Shore/shelf hypomethylation with CpG island hypermethylation
TCGA-F4-6570-01	0.790754	0.8719	0.9302	0.5844	0.6168	0.543	0.6173	0.6758	0.6266	0.5898	0.6713	0.5763	0.1048	0.5188	0.6316	0.7956	0.3545	Shore/shelf hypomethylation with CpG island hypermethylation
TCGA-AA-3660-01	0.555881	0.4947	0.7556	0.6529	0.6822	0.7478	0.6019	0.6916	0.546	0.4621	0.6984	0.4644	0.06379	0.2449	0.08641	0.8513	0.3549	Shore/shelf hypomethylation with CpG island hypermethylation
TCGA-NH-A6GB-01	0.526115	0.8356	0.9385	0.6107	0.6018	0.3217	0.3939	0.531	0.2735	0.05637	0.08664	0.0705	0.03224	0.09158	0.09665	0.8705	0.3556	Shore/shelf hypomethylation with CpG island hypermethylation
TCGA-DM-A1D4-01	0.150597	0.6068	0.8696	0.03139	0.2693	0.542	0.608	0.6446	0.6347	0.06566	0.05765	0.05315	0.04773	0.6553	0.1146	0.8548	0.3579	Shore/shelf hypomethylation with CpG island hypermethylation
TCGA-G4-6586-01	0.16349	0.9077	0.9489	0.6021	0.6703	0.6165	0.5951	0.6303	0.6878	0.7156	0.8239	0.797	0.5818	0.2583	0.1507	0.7461	0.3609	Shore/shelf hypomethylation with CpG island hypermethylation
TCGA-AZ-4615-01	0.613537	0.7728	0.857	0.5848	0.5886	0.5428	0.4743	0.6626	0.4444	0.473	0.6233	0.5441	0.07121	0.1176	0.1178	0.6369	0.3721	Shore/shelf hypomethylation with CpG island hypermethylation
TCGA-DM-A1D8-01	0.367351	0.909	0.936	0.693	0.7997	0.7005	0.6995	0.322	0.3359	0.2498	0.1789	0.03788	0.06573	0.3426	0.1476	0.9205	0.3723	Shore/shelf hypomethylation with CpG island hypermethylation
TCGA-DM-A1DB-01	0.150597	0.765	0.9095	0.5212	0.6601	0.5201	0.6139	0.6595	0.6169	0.08482	0.1355	0.07068	0.04075	0.07505	0.07457	0.8916	0.3726	Shore/shelf hypomethylation with CpG island hypermethylation
TCGA-D5-7000-01	1.17634	0.8233	0.9283	0.4928	0.5523	0.5913	0.4644	0.7046	0.5789	0.5433	0.6752	0.2507	0.04699	0.4913	0.1313	0.6312	0.378	Shore/shelf hypomethylation with CpG island hypermethylation
TCGA-CM-5860-01	1.1635	0.562	0.9337	0.6085	0.6701	0.6187	0.5863	0.7144	0.6139	0.656	0.6821	0.4921	0.298	0.4041	0.1469	0.3842	0.3911	Shore/shelf hypomethylation with CpG island hypermethylation
TCGA-DM-A1HB-01	0.251019	0.3749	0.8084	0.6163	0.608	0.5859	0.5798	0.7215	0.5832	0.6245	0.7355	0.7158	0.3737	0.3215	0.4924	0.907	0.4001	CpG island hypermethylation
TCGA-G4-6293-01	0.62293	0.6726	0.948	0.4698	0.5443	0.5413	0.5285	0.4448	0.3843	0.3959	0.4216	0.1991	0.04555	0.3052	0.106	0.6108	0.4011	CpG island hypermethylation
TCGA-CK-5916-01	0.74845	0.7399	0.9422	0.5976	0.5828	0.5454	0.5148	0.6934	0.5202	0.6245	0.688	0.6705	0.03584	0.398	0.4026	0.8859	0.4012	CpG island hypermethylation
TCGA-CK-4952-01	0.422273	0.3714	0.6861	0.6468	0.8552	0.7445	0.7063	0.7827	0.6212	0.6245	0.7401	0.551	0.05348	0.384	0.09916	0.5203	0.4055	CpG island hypermethylation
TCGA-CM-4747-01	0.604087	0.8442	0.8699	0.5508	0.6246	0.4658	0.491	0.5417	0.331	0.1096	0.08089	0.1091	0.04768	0.07423	0.06326	0.7817	0.4137	CpG island hypermethylation
TCGA-G4-6588-01	0.815589	0.914	0.9479	0.5948	0.5946	0.5191	0.6139	0.6853	0.7082	0.713	0.756	0.7205	0.05842	0.4356	0.5473	0.7265	0.418	CpG island hypermethylation
TCGA-NH-A50V-01	1.04965	0.9082	0.9223	0.6264	0.581	0.5528	0.5367	0.6463	0.5675	0.5886	0.6606	0.7142	0.06896	0.122	0.6274	0.5168	0.4317	CpG island hypermethylation
TCGA-DM-A28H-01	0.28686	0.8933	0.9126	0.6062	0.6383	0.55	0.5127	0.2276	0.2022	0.1005	0.1625	0.07496	0.04523	0.5777	0.1866	0.8954	0.4323	CpG island hypermethylation
TCGA-CM-6171-01	0.823748	0.4212	0.7925	0.7114	0.7764	0.6604	0.6585	0.7915	0.394	0.3042	0.4346	0.09814	0.03968	0.3391	0.06325	0.6296	0.4372	CpG island hypermethylation
TCGA-A6-3809-01	0.856001	0.8946	0.9203	0.5279	0.5881	0.5338	0.509	0.6291	0.5116	0.3993	0.5954	0.2974	0.195	0.3584	0.3514	0.7419	0.4388	CpG island hypermethylation
TCGA-4T-AA8H-01	0.26299	0.8302	0.8537	0.7225	0.7351	0.5972	0.5918	0.3995	0.3443	0.3195	0.3646	0.2884	0.1405	0.07443	0.06442	0.5109	0.4425	CpG island hypermethylation
TCGA-AA-3495-01	0.59455	0.8699	0.9059	0.5984	0.6804	0.4443	0.4569	0.5227	0.2786	0.2578	0.3215	0.1224	0.05299	0.188	0.1498	0.8598	0.4517	CpG island hypermethylation
TCGA-CM-4751-01	1.07038	0.6134	0.9241	0.5574	0.5856	0.4618	0.458	0.5344	0.4426	0.3162	0.3667	0.1095	0.04299	0.1685	0.1346	0.5852	0.4584	CpG island hypermethylation
TCGA-F4-6854-01	0.978174	0.8791	0.9189	0.5037	0.5985	0.3016	0.3444	0.5206	0.389	0.4058	0.436	0.3895	0.04433	0.3117	0.1588	0.9094	0.4666	CpG island hypermethylation
TCGA-CK-5913-01	0.933562	0.7094	0.9513	0.657	0.7395	0.5386	0.4659	0.5296	0.4481	0.1639	0.1106	0.04543	0.03279	0.2662	0.07145	0.9031	0.4674	CpG island hypermethylation
TCGA-A6-2686-01	0.713697	0.532	0.8721	0.5066	0.5974	0.5105	0.4888	0.5621	0.4627	0.5452	0.6406	0.5639	0.3008	0.4186	0.3912	0.5569	0.4725	CpG island hypermethylation
TCGA-G4-6321-01	0.37855	0.8362	0.9129	0.5046	0.4808	0.419	0.4533	0.5442	0.4451	0.488	0.5785	0.4713	0.2276	0.4221	0.4337	0.877	0.4777	CpG island hypermethylation
TCGA-AY-6386-01	0.535991	0.8766	0.9439	0.5921	0.5856	0.4387	0.4242	0.5153	0.2762	0.1946	0.2486	0.09384	0.08318	0.3395	0.1679	0.8777	0.4803	CpG island hypermethylation
TCGA-D5-6931-01	1.0566	0.5859	0.7629	0.4213	0.4891	0.4085	0.4125	0.552	0.4127	0.4545	0.5359	0.3054	0.04292	0.3924	0.3714	0.6936	0.4909	CpG island hypermethylation
TCGA-CM-6677-01	0.999979	0.4265	0.91	0.6155	0.5316	0.4728	0.5577	0.1831	0.08487	0.06653	0.03759	0.04075	0.03516	0.1436	0.07637	0.6257	0.494	CpG island hypermethylation
TCGA-DM-A28G-01	0.41145	0.7033	0.8967	0.4968	0.5759	0.5483	0.534	0.1095	0.06371	0.05637	0.0608	0.05381	0.04183	0.1347	0.08235	0.5995	0.4982	CpG island hypermethylation
TCGA-5M-AAT4-01	0.464706	0.7811	0.893	0.6868	0.6205	0.3379	0.3694	0.5039	0.07513	0.03685	0.04426	0.03504	0.0318	0.07497	0.04376	0.6547	0.4982	CpG island hypermethylation
TCGA-AD-6548-01	0.948623	0.4588	0.8862	0.3334	0.1957	0.4496	0.5062	0.5102	0.4266	0.3585	0.3364	0.1695	0.04488	0.1337	0.08901	0.5176	0.5104	CpG island hypermethylation
TCGA-AZ-6598-01	0.356222	0.9308	0.9573	0.8115	0.8796	0.7441	0.7371	0.825	0.8126	0.8085	0.8639	0.9318	0.3801	0.6343	0.7152	0.8589	0.5161	CpG island hypermethylation
TCGA-A6-A566-01	2.19819	0.8033	0.8925	0.4134	0.4522	0.3999	0.4312	0.5254	0.4322	0.482	0.5372	0.3632	0.04573	0.2995	0.1621	0.7434	0.5222	CpG island hypermethylation
TCGA-G4-6628-01	0.731174	0.7413	0.9436	0.483	0.4746	0.4468	0.4884	0.6123	0.5018	0.5702	0.6496	0.5986	0.06551	0.4857	0.6265	0.6257	0.5474	CpG island hypermethylation
TCGA-G4-6299-01	1.04263	0.8727	0.9523	0.5218	0.5278	0.4791	0.5575	0.5922	0.6342	0.6291	0.6918	0.6875	0.0747	0.3712	0.4737	0.8639	0.5525	CpG island hypermethylation
TCGA-CK-6751-01	0.739854	0.7859	0.9158	0.4829	0.5376	0.4959	0.5545	0.5953	0.5879	0.6257	0.649	0.5476	0.04514	0.2499	0.2968	0.8121	0.5641	CpG island hypermethylation
TCGA-A6-6653-01	0.799068	0.9024	0.9472	0.731	0.8375	0.6922	0.7109	0.7914	0.7658	0.7784	0.9247	0.8786	0.7867	0.7972	0.8183	0.8648	0.5808	CpG island hypermethylation
TCGA-QG-A5Z2-01	0.57538	0.9143	0.9392	0.6608	0.6565	0.5515	0.5557	0.6953	0.6287	0.6391	0.7216	0.706	0.1541	0.4421	0.2054	0.78	0.5883	CpG island hypermethylation
TCGA-CK-5914-01	0.62293	0.8313	0.9401	0.7259	0.8012	0.3745	0.495	0.6262	0.3943	0.07647	0.08487	0.04222	0.04281	0.06289	0.0884	0.564	0.6038	CpG island hypermethylation
TCGA-CK-4951-01	1.2265	0.4197	0.9131	0.5295	0.5771	0.4735	0.4883	0.6672	0.4166	0.2458	0.6068	0.627	0.08575	0.3274	0.2512	0.7626	0.6109	CpG island hypermethylation
TCGA-AZ-4616-01	0.48552	0.8759	0.9249	0.5556	0.6003	0.3729	0.4564	0.56	0.456	0.4846	0.5263	0.3205	0.05221	0.3806	0.4534	0.8891	0.6188	CpG island hypermethylation
TCGA-AD-6889-01	0.274952	0.7273	0.9379	0.8023	0.8559	0.7611	0.6998	0.8625	0.7228	0.8016	0.8767	0.9036	0.1041	0.7586	0.8677	0.6758	0.6248	CpG island hypermethylation
TCGA-CM-6165-01	1.45417	0.9031	0.937	0.6838	0.7181	0.4462	0.6419	0.5514	0.3542	0.1248	0.1192	0.04788	0.03548	0.1001	0.08577	0.4045	0.6372	CpG island hypermethylation
TCGA-F4-6461-01	1.1635	0.5043	0.9356	0.6136	0.6635	0.3501	0.5988	0.5555	0.4695	0.2185	0.1803	0.06194	0.06868	0.5694	0.1576	0.8917	0.6515	CpG island hypermethylation
TCGA-DM-A0XD-01	0.38957	0.6421	0.9255	0.5354	0.5797	0.5408	0.5562	0.6464	0.432	0.4723	0.4617	0.2947	0.03416	0.1282	0.46	0.7412	0.6686	CpG island hypermethylation
TCGA-A6-5661-01	0.874471	0.8377	0.9561	0.5802	0.6258	0.6333	0.6006	0.5848	0.599	0.6579	0.6998	0.7168	0.4805	0.5798	0.6693	0.8606	0.669	CpG island hypermethylation
TCGA-AD-A5EJ-01	0.613537	0.7162	0.9344	0.6654	0.7191	0.5834	0.5958	0.7408	0.6658	0.6614	0.7553	0.7981	0.3617	0.5938	0.7022	0.848	0.6792	CpG island hypermethylation
TCGA-CM-4743-01	0.226499	0.6062	0.913	0.4113	0.3115	0.3413	0.4067	0.5307	0.4426	0.4224	0.4872	0.3949	0.3642	0.4109	0.4677	0.7383	0.704	CpG island hypermethylation
TCGA-A6-5665-01	0.918387	0.7077	0.9374	0.5745	0.7546	0.5829	0.579	0.7523	0.6365	0.6488	0.7647	0.7365	0.05776	0.399	0.4047	0.7349	0.7049	CpG island hypermethylation
TCGA-AD-5900-01	0.799068	0.8233	0.919	0.6056	0.5053	0.5423	0.4161	0.5119	0.5359	0.5477	0.6689	0.6352	0.247	0.4966	0.6651	0.8183	0.72	CpG island hypermethylation
TCGA-A6-4105-01	0.879716	0.8706	0.9296	0.5437	0.5632	0.5233	0.567	0.1983	0.05062	0.06136	0.05681	0.06483	0.04416	0.1376	0.08685	0.5741	0.7544	CpG island hypermethylation
TCGA-CA-5255-01	0.57538	0.7986	0.9049	0.4137	0.4158	0.3633	0.3838	0.5405	0.327	0.3164	0.3737	0.2378	0.04628	0.2229	0.265	0.8496	0.8262	CpG island hypermethylation
TCGA-CM-5861-01	0.26299	0.8429	0.8522	0.7024	0.7207	0.6119	0.6318	0.7149	0.6968	0.6912	0.8155	0.7488	0.205	0.1995	0.242	0.465	0.8366	CpG island hypermethylation
TCGA-AD-6895-01	0.933562	0.8943	0.9219	0.5131	0.5178	0.448	0.4381	0.6434	0.4955	0.5457	0.6151	0.6442	0.3199	0.5114	0.5434	0.9125	0.847	CpG island hypermethylation
TCGA-CK-6747-01	0.63226	0.3147	0.9368	0.4137	0.4675	0.4089	0.6688	0.08565	0.422	0.2271	0.3223	0.3178	0.08878	0.3523	0.1572	0.4793	0.8472	CpG island hypermethylation
TCGA-AM-5821-01	0.985488	0.8751	0.9409	0.5453	0.5949	0.5442	0.5813	0.6058	0.5243	0.6766	0.7533	0.6997	0.2633	0.5595	0.6815	0.8639	0.8612	CpG island hypermethylation
TCGA-AZ-6606-01	0.731174	0.8648	0.9404	0.7684	0.8091	0.4724	0.5422	0.6206	0.353	0.2953	0.3146	0.1929	0.07164	0.2156	0.1281	0.9301	0.9087	CpG island hypermethylation
TCGA-NH-A8F7-06	0.251019	0.8189	0.4417	0.5436	0.5228	0.05462	0.2611	0.02076	0.03482	0.04626	0.03224	0.04137	0.02667	0.04131	0.02842	0.7536	0.1112	Shore/shelf hypomethylation with shore hypermethylation
TCGA-DM-A1DA-01	0.176365	0.5036	0.9322	0.8459	0.9029	0.8397	0.4888	0.4848	0.4198	0.24	0.5304	0.4139	0.03638	0.1468	0.06322	0.6065	0.1259	Shore/shelf hypomethylation with shore hypermethylation
TCGA-AA-3502-01	0.189063	0.6122	0.9083	0.8442	0.8992	0.1197	0.04758	0.03208	0.03364	0.04677	0.03966	0.06767	0.04697	0.05383	0.03393	0.6276	0.132	Shore/shelf hypomethylation with shore hypermethylation
TCGA-SS-A7HO-01	0.669016	0.4196	0.774	0.8334	0.8172	0.06667	0.1265	0.03169	0.03278	0.04651	0.03562	0.06726	0.04593	0.1069	0.04531	0.8825	0.1502	Shore/shelf hypomethylation with shore hypermethylation
TCGA-A6-6650-01	0.707814	0.6613	0.9551	0.8841	0.9096	0.3878	0.115	0.03125	0.04429	0.04594	0.04385	0.05491	0.04809	0.05609	0.0531	0.9135	0.1514	Shore/shelf hypomethylation with shore hypermethylation
TCGA-NH-A50T-01	0.274952	0.788	0.8885	0.8323	0.8583	0.06307	0.2208	0.02829	0.03548	0.04331	0.04078	0.04346	0.02915	0.2004	0.04758	0.4807	0.1667	Shore/shelf hypomethylation with shore hypermethylation
TCGA-QG-A5YX-01	0.28686	0.2605	0.7364	0.8126	0.8715	0.04471	0.1133	0.02505	0.03913	0.0537	0.03544	0.0439	0.03356	0.06639	0.03922	0.9021	0.1826	Shore/shelf hypomethylation with shore hypermethylation
TCGA-CA-5796-01	0.367351	0.9291	0.9412	0.7515	0.7984	0.1675	0.1018	0.02213	0.03742	0.03249	0.03009	0.03241	0.03624	0.1376	0.07814	0.8919	0.1934	Shore/shelf hypomethylation with shore hypermethylation
TCGA-DM-A28C-01	0.31032	0.913	0.9353	0.7913	0.08798	0.06885	0.02763	0.01804	0.03889	0.03953	0.02729	0.0226	0.03213	0.06988	0.04758	0.6273	0.2041	Shore/shelf hypomethylation with shore hypermethylation
TCGA-A6-2677-01	1.07726	0.6335	0.9129	0.6523	0.6664	0.214	0.03556	0.02898	0.05302	0.04922	0.02925	0.05409	0.02845	0.06677	0.03637	0.696	0.2412	Shore/shelf hypomethylation with shore hypermethylation
TCGA-AA-3663-01	0.28686	0.1319	0.9513	0.6879	0.7205	0.6989	0.4328	0.4314	0.2884	0.07433	0.08313	0.0405	0.03259	0.09187	0.2064	0.3191	0.2491	Shore/shelf hypomethylation with shore hypermethylation
TCGA-AZ-4682-01	0.333399	0.6574	0.7028	0.4024	0.5032	0.07955	0.1838	0.02542	0.04173	0.05008	0.0362	0.04411	0.02636	0.05785	0.03963	0.8842	0.2491	Shore/shelf hypomethylation with shore hypermethylation
TCGA-AZ-6599-01	0.124327	0.7583	0.9168	0.6835	0.8021	0.2137	0.358	0.03484	0.0251	0.07395	0.06391	0.07863	0.03342	0.04802	0.06235	0.3683	0.2646	Shore/shelf hypomethylation with shore hypermethylation
TCGA-D5-6537-01	0.28686	0.5622	0.8082	0.5917	0.768	0.06257	0.02566	0.02263	0.04231	0.04129	0.03198	0.03501	0.04071	0.05523	0.05064	0.7771	0.2726	Shore/shelf hypomethylation with shore hypermethylation
TCGA-AZ-4614-01	0.16349	0.7401	0.8554	0.6882	0.717	0.06514	0.03457	0.02743	0.03602	0.05344	0.04342	0.08645	0.03675	0.04027	0.06355	0.7416	0.2933	Shore/shelf hypomethylation with shore hypermethylation
TCGA-AY-A54L-01	0.189063	0.7142	0.8869	0.6976	0.6704	0.1656	0.2767	0.02282	0.03247	0.05112	0.03039	0.05055	0.03249	0.04467	0.03667	0.8486	0.2942	Shore/shelf hypomethylation with shore hypermethylation
TCGA-G4-6295-01	0.475017	0.5964	0.9404	0.5273	0.05891	0.04395	0.03096	0.02283	0.03566	0.06082	0.03508	0.03544	0.03194	0.08157	0.06657	0.7142	0.3118	Shore/shelf hypomethylation with shore hypermethylation
TCGA-CM-6169-01	1.82777	0.6447	0.8954	0.5422	0.5326	0.07378	0.3341	0.06625	0.06107	0.04716	0.04282	0.06598	0.03627	0.07428	0.07074	0.8316	0.3185	Shore/shelf hypomethylation with shore hypermethylation
TCGA-DM-A28F-01	0.422273	0.3192	0.9213	0.6002	0.5588	0.0489	0.03784	0.02388	0.05093	0.04474	0.0407	0.04028	0.0324	0.1016	0.0746	0.3752	0.3193	Shore/shelf hypomethylation with shore hypermethylation
TCGA-A6-5659-01	0.644618	0.9048	0.8959	0.703	0.8009	0.1226	0.05659	0.02295	0.0329	0.05746	0.03717	0.04435	0.03501	0.06359	0.04538	0.8877	0.3256	Shore/shelf hypomethylation with shore hypermethylation
TCGA-NH-A6GC-01	0.59455	0.8227	0.916	0.7865	0.8197	0.3736	0.3291	0.01949	0.0416	0.0438	0.03354	0.0336	0.03345	0.06188	0.04108	0.8697	0.3291	Shore/shelf hypomethylation with shore hypermethylation
TCGA-G4-6306-01	0.31032	0.9095	0.9466	0.7324	0.808	0.1421	0.04275	0.03256	0.04567	0.05	0.04235	0.05188	0.04021	0.1068	0.08546	0.674	0.3306	Shore/shelf hypomethylation with shore hypermethylation
TCGA-CM-6161-01	0.722454	0.2889	0.9269	0.5293	0.549	0.08874	0.3803	0.02366	0.04483	0.05661	0.0276	0.02342	0.03984	0.06754	0.0674	0.6633	0.3463	Shore/shelf hypomethylation with shore hypermethylation
TCGA-A6-6780-01	0.693022	0.7088	0.9523	0.6402	0.7052	0.4022	0.4202	0.06945	0.1428	0.09528	0.06762	0.03268	0.04921	0.4317	0.487	0.6961	0.3532	Shore/shelf hypomethylation with shore hypermethylation
TCGA-G4-6309-01	0.37855	0.9024	0.8339	0.7736	0.6949	0.49	0.3197	0.02032	0.03764	0.0521	0.039	0.02937	0.04884	0.2005	0.06507	0.9024	0.3643	Shore/shelf hypomethylation with shore hypermethylation
TCGA-AD-6901-01	1.09085	0.7359	0.8727	0.5283	0.45	0.3864	0.0247	0.02219	0.03253	0.04251	0.03209	0.0379	0.0198	0.08489	0.0616	0.8846	0.373	Shore/shelf hypomethylation with shore hypermethylation
TCGA-CM-5864-01	0.400624	0.8929	0.9337	0.7768	0.8141	0.5558	0.3511	0.02145	0.03901	0.03911	0.03182	0.03364	0.04513	0.09027	0.04484	0.92	0.3807	Shore/shelf hypomethylation with shore hypermethylation
TCGA-G4-6317-02	0.31032	0.6647	0.9499	0.8784	0.1873	0.0376	0.02491	0.02762	0.03035	0.03105	0.03031	0.03511	0.03053	0.04848	0.0322	0.3609	0.3907	Shore/shelf hypomethylation with shore hypermethylation
TCGA-RU-A8FL-01	0.16349	0.8288	0.9154	0.5387	0.4125	0.09521	0.05202	0.03769	0.05	0.04212	0.03163	0.05687	0.04336	0.1422	0.161	0.7537	0.3907	Shore/shelf hypomethylation with shore hypermethylation
TCGA-D5-5540-01	0.16349	0.8553	0.9328	0.6627	0.8131	0.09671	0.04722	0.0934	0.1836	0.07026	0.03401	0.04084	0.07335	0.07254	0.05035	0.145	0.6628	Shore/shelf hypomethylation with shore hypermethylation
TCGA-G4-6294-01	0.757041	0.8866	0.9423	0.7243	0.06629	0.05634	0.03537	0.02381	0.03585	0.05373	0.04174	0.06641	0.03874	0.03937	0.03998	0.2345	0.5996	Shore/shelf hypomethylation with shore hypermethylation
TCGA-AA-3655-01	1.13095	0.8087	0.8878	0.5929	0.6523	0.09424	0.02338	0.02401	0.03828	0.05604	0.04102	0.04205	0.02994	0.07342	0.05307	0.3975	0.8486	Shore/shelf hypomethylation with shore hypermethylation
TCGA-CA-5256-01	0.251019	0.7483	0.8779	0.6217	0.1086	0.05935	0.04322	0.02369	0.04443	0.0554	0.04892	0.06675	0.04736	0.05167	0.05336	0.4608	0.5043	Shore hypermethylation only
TCGA-5M-AATE-01	0.584968	0.7933	0.8844	0.7346	0.6428	0.04551	0.03884	0.01844	0.0396	0.03718	0.03316	0.03515	0.05679	0.1136	0.04736	0.466	0.9074	Shore hypermethylation only
TCGA-AY-5543-01	0.31032	0.5535	0.9171	0.6338	0.456	0.07317	0.03833	0.01835	0.04356	0.0515	0.03548	0.02498	0.04964	0.09053	0.07914	0.5512	0.4076	Shore hypermethylation only
TCGA-G4-6626-01	0.31032	0.4257	0.8002	0.5631	0.5658	0.05673	0.03293	0.02021	0.03747	0.07599	0.03659	0.03332	0.03749	0.06723	0.05453	0.5547	0.602	Shore hypermethylation only
TCGA-A6-5662-01	1.43827	0.4824	0.9386	0.4837	0.7105	0.05647	0.04283	0.02781	0.03224	0.05254	0.03157	0.03677	0.0514	0.06296	0.02881	0.558	0.8167	Shore hypermethylation only
TCGA-D5-6920-01	1.0072	0.7796	0.92	0.5176	0.47	0.06367	0.05551	0.04913	0.06202	0.04787	0.03974	0.06424	0.03458	0.08732	0.07722	0.5904	0.7123	Shore hypermethylation only
TCGA-D5-6922-01	1.3505	0.7622	0.7665	0.5817	0.3187	0.1433	0.358	0.04441	0.04587	0.04225	0.04508	0.0878	0.03484	0.1338	0.1057	0.5938	0.4501	Shore hypermethylation only
TCGA-AD-6890-01	0.59455	0.8159	0.9022	0.6331	0.6427	0.05537	0.0727	0.04172	0.04437	0.05333	0.0392	0.06992	0.06983	0.09905	0.09585	0.5981	0.4831	Shore hypermethylation only
TCGA-AY-6197-01	0.731174	0.7723	0.8841	0.5869	0.7269	0.6007	0.03295	0.03584	0.04739	0.06773	0.03995	0.289	0.03086	0.07358	0.1198	0.5983	0.604	Shore hypermethylation only
TCGA-AA-3509-01	0.659921	0.7185	0.9099	0.7687	0.6517	0.05043	0.0327	0.02672	0.03781	0.04887	0.0548	0.1024	0.04312	0.0624	0.0475	0.6389	0.6318	Shore hypermethylation only
TCGA-F4-6855-01	1.29275	0.859	0.8293	0.6581	0.5776	0.1655	0.03723	0.0345	0.0346	0.04886	0.04333	0.05319	0.02787	0.1239	0.06034	0.683	0.6007	Shore hypermethylation only
TCGA-AA-3496-01	1.1635	0.838	0.9135	0.5645	0.4939	0.06019	0.02951	0.02804	0.03325	0.05369	0.04075	0.03678	0.03325	0.1079	0.1452	0.7216	0.5291	Shore hypermethylation only
TCGA-D5-6926-01	1.18271	0.777	0.7902	0.5548	0.4731	0.0878	0.2546	0.0436	0.03963	0.05771	0.04845	0.07926	0.07877	0.1033	0.1349	0.7383	0.5548	Shore hypermethylation only
TCGA-DM-A282-01	0.495634	0.8979	0.9328	0.6969	0.7395	0.3349	0.4604	0.2395	0.03769	0.0494	0.03678	0.05763	0.03567	0.06576	0.04788	0.7647	0.6586	Shore hypermethylation only
TCGA-A6-6649-01	1.74397	0.8982	0.9215	0.5514	0.5314	0.04823	0.05099	0.02124	0.03842	0.05217	0.05447	0.04347	0.03115	0.1009	0.09843	0.7868	0.8058	Shore hypermethylation only
TCGA-CM-6172-01	1.16994	0.9096	0.9319	0.6884	0.7117	0.1834	0.2674	0.02967	0.02879	0.05125	0.02964	0.03792	0.04012	0.1138	0.09407	0.787	0.8704	Shore hypermethylation only
TCGA-F4-6856-01	0.948623	0.7806	0.9015	0.5629	0.4922	0.4009	0.3493	0.03775	0.06304	0.04729	0.04702	0.05606	0.03812	0.1168	0.1359	0.7879	0.814	Shore hypermethylation only
TCGA-NH-A50U-01	0.454043	0.765	0.4895	0.7446	0.6835	0.07691	0.03275	0.03348	0.02009	0.04666	0.04721	0.181	0.04093	0.06387	0.06366	0.7886	0.5945	Shore hypermethylation only
TCGA-A6-6138-01	0.887511	0.903	0.942	0.56	0.6384	0.1214	0.05546	0.0201	0.04097	0.05669	0.03864	0.05698	0.03109	0.1018	0.07482	0.7978	0.4201	Shore hypermethylation only
TCGA-CM-6676-01	0.910726	0.8891	0.907	0.5853	0.5982	0.359	0.1193	0.01898	0.04873	0.06314	0.03672	0.02818	0.04523	0.1351	0.07859	0.8002	0.4588	Shore hypermethylation only
TCGA-QL-A97D-01	0.62293	0.842	0.8707	0.6309	0.6615	0.06391	0.07994	0.02182	0.04545	0.04667	0.03338	0.03699	0.03372	0.1177	0.06475	0.8024	0.69	Shore hypermethylation only
TCGA-CM-5348-01	1.95638	0.8528	0.9267	0.5221	0.5249	0.3119	0.2062	0.02733	0.03983	0.05217	0.04717	0.03345	0.03459	0.0746	0.1037	0.8041	0.4146	Shore hypermethylation only
TCGA-AD-A5EK-01	0.76554	0.9186	0.9389	0.6187	0.8339	0.1563	0.3371	0.02602	0.04027	0.04297	0.02819	0.03023	0.02794	0.04348	0.03055	0.8072	0.5143	Shore hypermethylation only
TCGA-A6-6137-01	0.856001	0.8481	0.9227	0.47	0.7125	0.05563	0.0327	0.02496	0.02397	0.06573	0.05583	0.06771	0.05656	0.09904	0.08015	0.81	0.4944	Shore hypermethylation only
TCGA-A6-2682-01	0.790754	0.6108	0.9149	0.5117	0.5826	0.1278	0.03533	0.03207	0.0435	0.04879	0.03262	0.04291	0.04654	0.07887	0.06896	0.8116	0.5658	Shore hypermethylation only
TCGA-CK-4950-01	0.799068	0.8686	0.9118	0.4331	0.5258	0.3448	0.3876	0.348	0.4279	0.4167	0.3637	0.1965	0.112	0.2697	0.3034	0.8145	0.5107	Shore hypermethylation only
TCGA-D5-6923-01	2.06314	0.852	0.9022	0.563	0.495	0.0762	0.03603	0.04561	0.05225	0.0584	0.03983	0.05819	0.0622	0.125	0.09742	0.8181	0.779	Shore hypermethylation only
TCGA-D5-6927-01	1.08407	0.876	0.92	0.5054	0.4541	0.1158	0.0685	0.0447	0.08686	0.04784	0.04244	0.05309	0.03524	0.2663	0.2672	0.8193	0.8963	Shore hypermethylation only
TCGA-G4-6317-01	0.176365	0.8218	0.9224	0.7138	0.7119	0.07643	0.03602	0.02424	0.043	0.05461	0.03468	0.04034	0.03285	0.06987	0.04165	0.824	0.5739	Shore hypermethylation only
TCGA-AD-6899-01	1.53608	0.8632	0.9086	0.633	0.5956	0.4206	0.207	0.05113	0.04442	0.04837	0.04211	0.05116	0.03111	0.09173	0.09737	0.8282	0.8775	Shore hypermethylation only
TCGA-AD-6888-01	0.0704068	0.7659	0.9184	0.6834	0.6714	0.145	0.2101	0.03449	0.04997	0.049	0.03697	0.07286	0.04639	0.1036	0.06522	0.8377	0.5396	Shore hypermethylation only
TCGA-CM-6679-01	1.45417	0.9022	0.9283	0.4067	0.5201	0.07566	0.03221	0.02475	0.03541	0.03963	0.03744	0.03016	0.02854	0.1614	0.1233	0.8433	0.4742	Shore hypermethylation only
TCGA-CM-5863-01	0.613537	0.881	0.912	0.5007	0.4568	0.245	0.3033	0.2497	0.2434	0.0948	0.1211	0.03946	0.03182	0.1139	0.09283	0.8458	0.5217	Shore hypermethylation only
TCGA-CM-5862-01	0.505923	0.661	0.9334	0.7418	0.8358	0.3958	0.06786	0.02433	0.0306	0.0416	0.03794	0.04647	0.03592	0.08627	0.0411	0.8486	0.5975	Shore hypermethylation only
TCGA-CM-6678-01	1.19535	0.8916	0.9091	0.6398	0.6656	0.202	0.05125	0.02559	0.0636	0.06486	0.04145	0.02985	0.041	0.09094	0.05848	0.8563	0.9237	Shore hypermethylation only
TCGA-F4-6463-01	1.12432	0.4798	0.8992	0.5221	0.374	0.1875	0.3735	0.1221	0.057	0.04907	0.03643	0.04478	0.03401	0.08401	0.1195	0.8593	0.4728	Shore hypermethylation only
TCGA-QG-A5Z1-01	0.933562	0.8069	0.8679	0.5676	0.4892	0.0578	0.02697	0.02831	0.028	0.04593	0.04025	0.05185	0.02682	0.0418	0.056	0.8713	0.8325	Shore hypermethylation only
TCGA-AY-A69D-01	0.757041	0.8649	0.9387	0.7208	0.678	0.3399	0.4496	0.5	0.3668	0.2893	0.2979	0.1239	0.04959	0.1503	0.06622	0.8765	0.9148	Shore hypermethylation only
TCGA-QG-A5YW-01	0.856001	0.8674	0.9268	0.6139	0.6356	0.2108	0.05941	0.02899	0.03526	0.05953	0.02864	0.04289	0.036	0.05873	0.05107	0.8795	0.767	Shore hypermethylation only
TCGA-CA-5254-01	0.773987	0.7768	0.9475	0.7524	0.7626	0.5645	0.3991	0.06893	0.37	0.3949	0.4247	0.1102	0.269	0.32	0.4428	0.8815	0.6678	Shore hypermethylation only
TCGA-A6-A5ZU-01	1.02146	0.6782	0.8779	0.762	0.7039	0.08694	0.0525	0.02687	0.03498	0.0452	0.02918	0.05424	0.03342	0.1153	0.1107	0.8832	0.7	Shore hypermethylation only
TCGA-CA-6718-01	0.731174	0.8529	0.9247	0.5394	0.5278	0.3793	0.1892	0.02917	0.09613	0.08611	0.0595	0.03783	0.04495	0.4178	0.4373	0.8836	0.7283	Shore hypermethylation only
TCGA-AZ-6607-01	2.75249	0.909	0.9188	0.6054	0.6284	0.07147	0.07362	0.02351	0.0511	0.04296	0.04072	0.03561	0.03485	0.09636	0.08419	0.8843	0.9488	Shore hypermethylation only
TCGA-3L-AA1B-01	0.99279	0.8716	0.8359	0.465	0.5113	0.339	0.3885	0.4027	0.04983	0.04339	0.03528	0.1015	0.03798	0.1793	0.09661	0.8847	0.5574	Shore hypermethylation only
TCGA-DM-A1D0-01	0.201684	0.6917	0.8346	0.7688	0.7581	0.05412	0.03412	0.02056	0.03508	0.05223	0.03017	0.03412	0.0297	0.07856	0.04446	0.8861	0.6606	Shore hypermethylation only
TCGA-D5-6535-01	0.863959	0.8427	0.9266	0.5818	0.5794	0.1375	0.383	0.02248	0.02449	0.0517	0.03336	0.04427	0.02798	0.09594	0.0985	0.8872	0.4063	Shore hypermethylation only
TCGA-AZ-6600-01	1.04965	0.9161	0.9305	0.6042	0.6334	0.5322	0.4752	0.04501	0.116	0.05561	0.05299	0.04187	0.03633	0.4152	0.2736	0.897	0.5585	Shore hypermethylation only
TCGA-CM-6680-01	0.933562	0.4499	0.9457	0.6648	0.163	0.06754	0.04143	0.02236	0.04124	0.05048	0.03859	0.03428	0.03519	0.09202	0.07936	0.897	0.6736	Shore hypermethylation only
TCGA-CM-6166-01	0.687044	0.5956	0.8991	0.6576	0.5599	0.1126	0.4958	0.02807	0.04919	0.06481	0.03214	0.03739	0.04184	0.07308	0.06687	0.8972	0.4805	Shore hypermethylation only
TCGA-A6-5660-01	0.57538	0.8607	0.8131	0.6808	0.7038	0.4775	0.3357	0.03862	0.03544	0.06333	0.03974	0.04603	0.03648	0.1237	0.1306	0.9003	0.4017	Shore hypermethylation only
TCGA-AZ-4315-01	0.464706	0.8712	0.9248	0.4206	0.5731	0.05095	0.02309	0.02356	0.0424	0.0521	0.03691	0.05139	0.03715	0.07202	0.07289	0.9048	0.4917	Shore hypermethylation only
TCGA-NH-A6GA-01	1.63696	0.8534	0.9232	0.6175	0.6799	0.2322	0.3751	0.0332	0.02513	0.03168	0.02795	0.1084	0.03485	0.0576	0.08509	0.9161	0.7204	Shore hypermethylation only
TCGA-CK-5915-01	0.678058	0.349	0.9556	0.8482	0.8751	0.3225	0.3767	0.4574	0.4179	0.151	0.3026	0.05673	0.0442	0.08836	0.06654	0.9162	0.498	Shore hypermethylation only
TCGA-DM-A28A-01	0.722454	0.8822	0.9116	0.7847	0.7398	0.104	0.02976	0.02826	0.03818	0.05158	0.04355	0.0458	0.03211	0.05627	0.05649	0.9171	0.94	Shore hypermethylation only
TCGA-G4-6298-01	0.773987	0.8634	0.5638	0.6105	0.5981	0.05303	0.02434	0.01965	0.04615	0.037	0.029	0.03655	0.02862	0.06025	0.06146	0.921	0.414	Shore hypermethylation only
TCGA-DM-A0XF-01	0.555881	0.8622	0.9123	0.5606	0.5693	0.1861	0.2168	0.02963	0.03838	0.04984	0.03315	0.03752	0.02623	0.0915	0.06808	0.9265	0.7814	Shore hypermethylation only
TCGA-DM-A1HA-01	0.76554	0.8942	0.9413	0.8994	0.9107	0.0652	0.4116	0.01616	0.02597	0.04325	0.02424	0.02465	0.02792	0.4261	0.04521	0.9277	0.9548	Shore hypermethylation only
TCGA-AA-3713-11	0.604087	0.8826	0.9239	0.2089	0.1137	0.0462	0.03969	0.0216	0.04124	0.04189	0.02632	0.03507	0.05518	0.1006	0.09446	0.8635	0.8241	Normal tissue
TCGA-AA-3655-11	0.704867	0.8072	0.9231	0.159	0.06553	0.05643	0.04575	0.02209	0.0515	0.06243	0.04654	0.02491	0.04605	0.08102	0.06581	0.8215	0.9063	Normal tissue
TCGA-AA-3660-11	0.731174	0.8831	0.9064	0.2067	0.1265	0.06927	0.06035	0.02089	0.04415	0.0512	0.03487	0.02662	0.03643	0.08292	0.07529	0.8882	0.8729	Normal tissue
TCGA-A6-2684-11	0.63226	0.8977	0.9151	0.4452	0.4655	0.04952	0.02514	0.02477	0.037	0.04599	0.02974	0.0483	0.03527	0.07614	0.0692	0.7841	0.8686	Normal tissue
TCGA-A6-2671-11	0.871834	0.8809	0.8981	0.2606	0.2695	0.05614	0.04449	0.02657	0.05076	0.03855	0.03236	0.04867	0.02715	0.07729	0.05635	0.8224	0.8677	Normal tissue
TCGA-A6-2685-11	0.887511	0.9041	0.9243	0.1944	0.09544	0.05532	0.02503	0.02831	0.03622	0.0483	0.02845	0.04854	0.03684	0.06705	0.06314	0.8095	0.8911	Normal tissue
TCGA-A6-2680-11	0.895309	0.8624	0.9085	0.1866	0.167	0.07726	0.05179	0.02388	0.03604	0.04385	0.03333	0.03868	0.03963	0.07814	0.0627	0.7994	0.9122	Normal tissue
TCGA-A6-2682-11	0.985488	0.9061	0.9205	0.2611	0.2001	0.05145	0.03301	0.02873	0.04177	0.06323	0.03222	0.05218	0.03544	0.07648	0.08644	0.8027	0.8542	Normal tissue
TCGA-A6-2679-11	1.0072	0.8821	0.9115	0.2659	0.285	0.06796	0.03931	0.02629	0.03866	0.04444	0.03234	0.04081	0.03074	0.1093	0.1049	0.7771	0.8136	Normal tissue
TCGA-A6-2686-11	1.03564	0.882	0.9095	0.3084	0.3446	0.0602	0.03522	0.0322	0.04469	0.0469	0.03453	0.04011	0.03481	0.06919	0.0653	0.8217	0.886	Normal tissue
TCGA-A6-5667-11	1.09085	0.8604	0.8914	0.2103	0.1284	0.0614	0.03437	0.01965	0.03953	0.04793	0.03572	0.02964	0.03545	0.07072	0.06209	0.8683	0.8838	Normal tissue
TCGA-AA-3712-11	1.257	0.8465	0.9131	0.1657	0.07548	0.09092	0.02819	0.01986	0.04223	0.05681	0.03351	0.03322	0.03491	0.06905	0.06351	0.8664	0.8462	Normal tissue
TCGA-AZ-6598-11	1.2869	0.8832	0.8872	0.204	0.078	0.06481	0.04231	0.02341	0.4743	0.05125	0.03429	0.03554	0.04811	0.09225	0.1014	0.7678	0.8461	Normal tissue
TCGA-AZ-6600-11	1.33915	0.9041	0.9145	0.3541	0.2629	0.07079	0.02901	0.02342	0.04434	0.04465	0.03433	0.03732	0.04279	0.09768	0.08688	0.8086	0.8767	Normal tissue
TCGA-AA-3663-11	1.44358	0.8495	0.8987	0.2038	0.1022	0.04449	0.0323	0.01663	0.03351	0.04884	0.02945	0.0294	0.03201	0.07188	0.08541	0.869	0.8895	Normal tissue
TCGA-AZ-6599-11	1.51603	0.9213	0.917	0.2484	0.131	0.04872	0.03637	0.03234	0.03217	0.04397	0.03376	0.05255	0.03347	0.09203	0.05323	0.842	0.8498	Normal tissue
TCGA-A6-2675-11	1.65535	0.7461	0.8222	0.135	0.5877	0.05769	0.02203	0.06501	0.03317	0.04564	0.3356	0.07411	0.04719	0.1213	0.04934	0.6934	0.8991	Normal tissue

## Sheet: Key
Methylation beta-values >0.5 highlighted in orange.
Methylation beta-values <0.4 highlighted in pink.
CpG sites cg26255261 and cg02551980 show hypermethylation in both normal and cancer tissue (green).
