# Supplementary material for: MCC Gene Silencing Is a CpG Island Methylator Phenotype-Associated Factor That Predisposes Colon Cancer Cells to Irinotecan and Olaparib
Source: Cancers (Basel). 2022 Jun 9;14(12):2859. doi: 10.3390/cancers14122859 (PMC9221012; doi:10.3390/cancers14122859)
Supplement: Supplementary file 1 [file cancers-14-02859-s001.zip › Table S2.xlsx]

## Sheet: MCC expression & methylation
READ		N-Shelf	N-Shore	N-Shore	N-Shore	N-Shore	CpG island	CpG island	CpG island	S-Shore	S-Shore	S-Shore	S-Shore	S-Shore	S-Shore	S-Shore	S-Shelf	<- CpG island-related region
		113291749	113292722	113293868	113293907	113294344	113294528	113294716	113294926	113294980	113294987	113294998	113295114	113295293	113295355	113295829	113298739	<- Genomic coordinate GRCh38
TCGA patient ID	MCC-201 mRNA expression	cg26255261	cg02551980	cg07249274	cg11606461	cg18348337	cg06894812	cg21541120	cg15391499	cg04614008	cg24003542	cg08391321	cg07328209	cg22149359	cg06512849	cg23958684	cg06628473	<- Illumina 450K array CpG site IDs
TCGA-DC-5337-01	0.251019	0.6166	0.9317	0.448	0.4648	0.07875	0.07554	0.01788	0.04292	0.05683	0.03527	0.02315	0.03327	0.08559	0.07364	0.809	0.4905	No differential methylation
TCGA-EI-6881-01	0.400624	0.8358	0.9138	0.4754	0.4632	0.07051	0.07157	0.01771	0.03556	0.0614	0.02819	0.02852	0.02948	0.07711	0.06433	0.8591	0.7579	No differential methylation
TCGA-DC-4749-01	0.475017	0.7323	0.913	0.2819	0.2235	0.2836	0.3168	0.08716	0.05241	0.04608	0.02601	0.02981	0.04587	0.05189	0.04531	0.5182	0.5077	No differential methylation
TCGA-DY-A0XA-01	0.516088	0.5971	0.9206	0.04254	0.1492	0.07111	0.02851	0.02673	0.02525	0.05198	0.03782	0.07038	0.02541	0.07576	0.04727	0.6915	0.8382	No differential methylation
TCGA-EI-6509-01	0.516088	0.6711	0.9138	0.0131	0.02612	0.04172	0.01947	0.01398	0.02833	0.03602	0.021	0.02211	0.01875	0.02841	0.02471	0.8999	0.5394	No differential methylation
TCGA-AF-6672-01	0.584968	0.9017	0.8952	0.02821	0.0406	0.06009	0.02767	0.01805	0.03651	0.0554	0.03703	0.03186	0.03866	0.08916	0.04496	0.8906	0.4102	No differential methylation
TCGA-DY-A1DC-01	0.584968	0.7375	0.8661	0.01931	0.04714	0.05255	0.04106	0.02796	0.03589	0.04754	0.04568	0.07266	0.03066	0.08231	0.08262	0.8311	0.8609	No differential methylation
TCGA-AH-6643-01	0.613537	0.8418	0.9184	0.2786	0.4729	0.3033	0.1448	0.1434	0.1186	0.06354	0.05018	0.02588	0.02868	0.0779	0.05979	0.5311	0.7487	No differential methylation
TCGA-F5-6863-01	0.613537	0.845	0.942	0.114	0.327	0.2062	0.03539	0.02319	0.03623	0.0523	0.03737	0.0274	0.03486	0.06543	0.05625	0.8953	0.8342	No differential methylation
TCGA-AF-2693-01	0.669016	0.8798	0.9296	0.4029	0.3859	0.4973	0.3476	0.01879	0.04278	0.03395	0.02149	0.02615	0.04581	0.0696	0.06813	0.9034	0.9173	No differential methylation
TCGA-CI-6623-01	0.669016	0.927	0.8764	0.4321	0.3204	0.1024	0.03779	0.02046	0.04441	0.05732	0.03524	0.0273	0.02843	0.1345	0.1455	0.9115	0.4203	No differential methylation
TCGA-EI-6506-01	0.687044	0.8544	0.8824	0.4497	0.4785	0.1098	0.3822	0.2927	0.214	0.04905	0.02977	0.02997	0.03079	0.05404	0.04078	0.6018	0.5397	No differential methylation
TCGA-AG-3592-01	0.790754	0.7314	0.8568	0.2306	0.3104	0.3095	0.2857	0.01725	0.03625	0.03886	0.02072	0.02916	0.03025	0.0312	0.05094	0.6983	0.9056	No differential methylation
TCGA-DC-6157-01	0.83188	0.8449	0.3812	0.2228	0.1497	0.05304	0.2135	0.02213	0.04016	0.05575	0.03151	0.02751	0.03723	0.206	0.05545	0.9022	0.4848	No differential methylation
TCGA-AF-4110-01	0.848008	0.8586	0.9008	0.2702	0.3015	0.03057	0.03168	0.01835	0.04349	0.03767	0.02621	0.02778	0.02308	0.07728	0.05778	0.8237	0.9106	No differential methylation
TCGA-CI-6619-01	0.848008	0.6161	0.9282	0.2979	0.3294	0.07488	0.2503	0.01991	0.03305	0.05941	0.03034	0.02671	0.0411	0.1195	0.06846	0.8033	0.4873	No differential methylation
TCGA-EI-7002-01	0.871834	0.6708	0.8983	0.279	0.05565	0.324	0.3788	0.3537	0.05261	0.05279	0.03107	0.02564	0.03872	0.08938	0.06036	0.8949	0.644	No differential methylation
TCGA-AG-3732-01	0.933562	0.8752	0.6071	0.01946	0.02856	0.04576	0.06829	0.02142	0.03775	0.06176	0.04215	0.03449	0.03673	0.125	0.09506	0.9104	0.4721	No differential methylation
TCGA-EI-6917-01	0.963466	0.8039	0.9109	0.3083	0.3393	0.1191	0.1118	0.02564	0.05993	0.06693	0.05017	0.02997	0.06243	0.1513	0.06599	0.8324	0.6273	No differential methylation
TCGA-CI-6624-01	1.0566	0.6328	0.9175	0.2625	0.0902	0.05394	0.03575	0.02362	0.05741	0.04413	0.03876	0.0278	0.03642	0.1002	0.0893	0.7411	0.6259	No differential methylation
TCGA-EI-6884-01	1.18271	0.8765	0.9455	0.3203	0.2786	0.09901	0.04051	0.02381	0.03597	0.05206	0.03462	0.03335	0.02952	0.1244	0.07529	0.8818	0.6924	No differential methylation
TCGA-F5-6812-01	1.18271	0.8854	0.9209	0.2822	0.3938	0.04966	0.03775	0.025	0.03884	0.04709	0.02478	0.02661	0.03391	0.09089	0.1081	0.846	0.633	No differential methylation
TCGA-DC-6681-01	1.23264	0.8909	0.9021	0.3153	0.44	0.443	0.2314	0.02288	0.04563	0.04577	0.03297	0.02564	0.03617	0.0884	0.09518	0.7753	0.8813	No differential methylation
TCGA-AF-A56K-01	1.34485	0.8337	0.8641	0.02424	0.0317	0.05902	0.164	0.02024	0.03145	0.03057	0.03565	0.03411	0.02713	0.05203	0.05581	0.8622	0.8184	No differential methylation
TCGA-AH-6549-01	1.34485	0.6124	0.894	0.05002	0.03297	0.06183	0.0319	0.01781	0.03619	0.04459	0.03025	0.02731	0.0387	0.1081	0.06331	0.4527	0.5372	No differential methylation
TCGA-EI-6885-01	1.34485	0.472	0.5906	0.02037	0.03026	0.03846	0.06284	0.02177	0.03441	0.04255	0.03134	0.03473	0.03883	0.1034	0.06868	0.6015	0.567	No differential methylation
TCGA-CI-6621-01	1.38958	0.8929	0.9165	0.4964	0.4364	0.03843	0.04486	0.02017	0.04203	0.04762	0.03714	0.02224	0.03059	0.08852	0.045	0.884	0.9012	No differential methylation
TCGA-F5-6465-01	1.44358	0.536	0.7536	0.2783	0.3069	0.04153	0.02527	0.01715	0.03593	0.03573	0.02932	0.0304	0.02277	0.07828	0.05643	0.8315	0.4315	No differential methylation
TCGA-AF-2690-01	1.51603	0.6129	0.7322	0.2272	0.2901	0.05169	0.04306	0.02023	0.02623	0.03962	0.03093	0.04145	0.02582	0.06319	0.07828	0.6746	0.7342	No differential methylation
TCGA-AH-6547-01	1.52104	0.8663	0.925	0.3472	0.3394	0.05816	0.06811	0.02881	0.04177	0.04916	0.03177	0.02055	0.03439	0.1249	0.1078	0.9151	0.7637	No differential methylation
TCGA-EI-6507-01	1.66903	0.846	0.9147	0.2223	0.2963	0.07058	0.02467	0.01931	0.03032	0.04265	0.0259	0.03531	0.02717	0.1296	0.2249	0.8817	0.9219	No differential methylation
TCGA-AF-2687-01	1.70074	0.6204	0.6201	0.02717	0.04345	0.06277	0.02329	0.0201	0.02456	0.04296	0.02772	0.04265	0.03471	0.05624	0.08618	0.6946	0.7497	No differential methylation
TCGA-DC-6156-01	1.73556	0.8829	0.8964	0.3071	0.395	0.3262	0.4535	0.4657	0.06088	0.04745	0.03297	0.03213	0.03649	0.123	0.1146	0.75	0.7851	No differential methylation
TCGA-F5-6464-01	1.8952	0.7587	0.8827	0.3915	0.3843	0.04443	0.2159	0.01771	0.1664	0.0439	0.03516	0.02631	0.02713	0.0784	0.06034	0.8684	0.6146	No differential methylation
TCGA-F5-6702-01	2.05629	0.8424	0.5399	0.127	0.06364	0.05596	0.03333	0.03282	0.03888	0.1023	0.06014	0.03239	0.0428	0.08016	0.1125	0.7736	0.6559	No differential methylation
TCGA-DC-6155-01	0.084067	0.8595	0.9148	0.2042	0.03668	0.1234	0.04521	0.02134	0.04117	0.05264	0.03985	0.0274	0.0416	0.09428	0.05814	0.9084	0.3929	Hypomethylation only
TCGA-DY-A1DG-01	0.214106	0.3188	0.8389	0.02496	0.06078	0.06017	0.08371	0.0277	0.03605	0.04568	0.0486	0.08801	0.04188	0.05832	0.04592	0.5536	0.08932	Hypomethylation only
TCGA-AG-3725-01	0.28686	0.8179	0.7613	0.337	0.3179	0.04739	0.02981	0.01654	0.03437	0.03942	0.02719	0.02646	0.02473	0.06219	0.05354	0.7924	0.2698	Hypomethylation only
TCGA-EI-6510-01	0.400624	0.6329	0.8894	0.02779	0.07283	0.2388	0.01976	0.01779	0.03437	0.04864	0.03339	0.03942	0.0331	0.04986	0.08353	0.3786	0.4595	Hypomethylation only
TCGA-EI-6513-01	0.475017	0.365	0.8688	0.07983	0.1484	0.04911	0.02907	0.01997	0.04399	0.04424	0.03676	0.04708	0.03571	0.0384	0.05443	0.4621	0.2917	Hypomethylation only
TCGA-DY-A1DE-01	0.516088	0.2359	0.9287	0.1319	0.3371	0.05571	0.02964	0.02418	0.03199	0.0491	0.02869	0.04622	0.03237	0.04273	0.05167	0.2686	0.2284	Hypomethylation only
TCGA-DC-6160-01	0.669016	0.9195	0.9291	0.3816	0.3359	0.05914	0.08743	0.01795	0.04065	0.05337	0.03051	0.02193	0.0327	0.08869	0.09455	0.3934	0.8489	Hypomethylation only
TCGA-AG-4022-01	1.12432	0.4159	0.4841	0.04224	0.06534	0.03738	0.0246	0.0182	0.03482	0.04121	0.0262	0.03043	0.02727	0.06272	0.0582	0.6137	0.3824	Hypomethylation only
TCGA-F5-6811-01	1.63696	0.657	0.7427	0.3534	0.04767	0.07346	0.04629	0.019	0.0683	0.04594	0.02845	0.01979	0.03943	0.147	0.08836	0.9063	0.3025	Hypomethylation only
TCGA-DY-A1DF-01	0.333399	0.3198	0.5835	0.5598	0.5195	0.2421	0.02899	0.0247	0.04102	0.04329	0.03349	0.03852	0.03431	0.03646	0.03324	0.2594	0.0677	Shore/shelf hypomethylation with shore hypermethylation
TCGA-AH-6897-01	0.443588	0.1549	0.575	0.8479	0.9464	0.5869	0.5401	0.08737	0.1282	0.07684	0.2866	0.0413	0.03358	0.5305	0.06406	0.6087	0.1185	Shore/shelf hypomethylation with shore hypermethylation
TCGA-AG-3591-01	0.176365	0.7591	0.9	0.7421	0.8709	0.08143	0.3729	0.02442	0.03471	0.04031	0.04092	0.0388	0.03827	0.03791	0.04187	0.3049	0.1744	Shore/shelf hypomethylation with shore hypermethylation
TCGA-EI-6514-01	0.879716	0.6352	0.8839	0.4752	0.7689	0.1752	0.3762	0.5565	0.2976	0.1001	0.05372	0.02476	0.07712	0.2301	0.05049	0.8836	0.2018	Shore/shelf hypomethylation with shore hypermethylation
TCGA-DC-6154-01	0.400624	0.7459	0.7787	0.7969	0.8081	0.05436	0.3283	0.02312	0.04746	0.04958	0.03874	0.03378	0.04749	0.0783	0.0461	0.8192	0.2046	Shore/shelf hypomethylation with shore hypermethylation
TCGA-EF-5830-01	0.41145	0.8142	0.7914	0.4834	0.5062	0.2232	0.1242	0.01845	0.05837	0.05127	0.03268	0.0229	0.03551	0.09001	0.07505	0.2573	0.2102	Shore/shelf hypomethylation with shore hypermethylation
TCGA-EI-6508-01	0.687044	0.3508	0.8973	0.729	0.8118	0.4034	0.4372	0.5001	0.3487	0.05611	0.05033	0.02911	0.2949	0.1007	0.04744	0.2467	0.2207	Shore/shelf hypomethylation with shore hypermethylation
TCGA-AF-3911-01	0.713697	0.7994	0.8573	0.6438	0.7873	0.0579	0.02373	0.02341	0.03091	0.03903	0.03732	0.04906	0.02719	0.05258	0.04548	0.8135	0.2412	Shore/shelf hypomethylation with shore hypermethylation
TCGA-DY-A1DD-01	0.344751	0.8001	0.8753	0.7355	0.204	0.04616	0.05767	0.02443	0.04176	0.06562	0.0414	0.06232	0.02827	0.08774	0.06354	0.3117	0.2692	Shore/shelf hypomethylation with shore hypermethylation
TCGA-AG-3742-01	1.07726	0.6859	0.7864	0.7405	0.7993	0.5148	0.4388	0.02327	0.03418	0.04464	0.03298	0.02211	0.03329	0.08136	0.04257	0.7275	0.2749	Shore/shelf hypomethylation with shore hypermethylation
TCGA-EF-5831-01	0.823748	0.8837	0.9356	0.6839	0.7201	0.6168	0.5972	0.7081	0.3822	0.3297	0.3874	0.05563	0.03001	0.1925	0.2808	0.3107	0.2905	Shore/shelf hypomethylation with shore hypermethylation
TCGA-DC-6683-01	0.799068	0.4983	0.7142	0.4775	0.5258	0.05355	0.05492	0.01917	0.04252	0.03712	0.03377	0.02159	0.04078	0.09056	0.05868	0.7591	0.306	Shore/shelf hypomethylation with shore hypermethylation
TCGA-CL-5918-01	0.31032	0.862	0.8994	0.6276	0.6906	0.4698	0.1371	0.02356	0.03611	0.0568	0.03884	0.02816	0.03108	0.1304	0.0637	0.902	0.3256	Shore/shelf hypomethylation with shore hypermethylation
TCGA-G5-6641-01	0.214106	0.4241	0.7614	0.5913	0.7042	0.2448	0.4221	0.2725	0.04848	0.05938	0.0334	0.02452	0.05357	0.08716	0.05512	0.3616	0.3393	Shore/shelf hypomethylation with shore hypermethylation
TCGA-AG-4021-01	0.978174	0.4015	0.488	0.0299	0.27	0.6302	0.555	0.6871	0.02921	0.04091	0.04414	0.04641	0.03072	0.04596	0.05229	0.5239	0.3583	Shore/shelf hypomethylation with shore hypermethylation
TCGA-EI-6882-01	0.933562	0.2919	0.9476	0.5012	0.7504	0.04572	0.04143	0.01997	0.04515	0.04137	0.04174	0.02821	0.03866	0.08048	0.2347	0.8944	0.3601	Shore/shelf hypomethylation with shore hypermethylation
TCGA-DC-5869-01	0.669016	0.4268	0.848	0.6493	0.6663	0.3581	0.3444	0.01904	0.05709	0.05036	0.03289	0.02835	0.03528	0.08805	0.1144	0.7812	0.3698	Shore/shelf hypomethylation with shore hypermethylation
TCGA-DY-A1H8-01	0.0976133	0.8426	0.9382	0.8239	0.7963	0.04717	0.03815	0.02827	0.03147	0.05043	0.0321	0.07531	0.02333	0.06222	0.03168	0.1155	0.9032	Shore/shelf hypomethylation with shore hypermethylation
TCGA-AF-6136-01	0.731174	0.8774	0.9074	0.5977	0.6711	0.5694	0.5816	0.6935	0.4201	0.4512	0.4198	0.3412	0.03978	0.1088	0.06038	0.3679	0.9183	Shore/shelf hypomethylation with shore hypermethylation
TCGA-AF-6655-01	1.76579	0.8015	0.9086	0.4987	0.5095	0.2736	0.3727	0.02379	0.03812	0.04726	0.03626	0.02711	0.04245	0.1015	0.05104	0.4096	0.7087	Shore hypermethylation
TCGA-CI-6620-01	1.0566	0.8865	0.902	0.5436	0.5692	0.1779	0.4126	0.205	0.0393	0.04458	0.03791	0.02204	0.02366	0.2641	0.1783	0.5223	0.459	Shore hypermethylation
TCGA-F5-6861-01	0.516088	0.8808	0.9206	0.4926	0.5445	0.411	0.2002	0.02496	0.04379	0.04933	0.03134	0.02837	0.03069	0.09976	0.1423	0.6193	0.7337	Shore hypermethylation
TCGA-DC-4745-01	0.48552	0.7898	0.8325	0.7554	0.8239	0.05963	0.04376	0.0257	0.03228	0.04611	0.03197	0.03322	0.02523	0.03894	0.05179	0.6339	0.8329	Shore hypermethylation
TCGA-F5-6864-01	1.13095	0.5649	0.8342	0.5315	0.5454	0.3855	0.3816	0.07045	0.09603	0.05949	0.03805	0.03081	0.03403	0.1973	0.1071	0.6433	0.463	Shore hypermethylation
TCGA-AF-A56L-01	0.757041	0.6638	0.8795	0.537	0.533	0.05444	0.137	0.01685	0.03527	0.03857	0.02744	0.03154	0.02674	0.06947	0.06117	0.6725	0.794	Shore hypermethylation
TCGA-DC-6158-01	2.07075	0.6791	0.867	0.02238	0.03172	0.5743	0.5334	0.5947	0.2853	0.06082	0.04942	0.03625	0.1293	0.2452	0.08413	0.7394	0.4868	Shore hypermethylation
TCGA-F5-6813-01	0.641556	0.8823	0.9264	0.6646	0.6809	0.07676	0.6022	0.2532	0.03815	0.06803	0.02954	0.02604	0.03545	0.1288	0.102	0.7555	0.8848	Shore hypermethylation
TCGA-F5-6814-01	0.57538	0.7508	0.924	0.479	0.5096	0.5452	0.1827	0.0332	0.05847	0.05853	0.03462	0.03554	0.02612	0.1148	0.09089	0.7617	0.4098	Shore hypermethylation
TCGA-EI-6511-01	0.739854	0.6961	0.9344	0.4779	0.5127	0.04838	0.02454	0.01596	0.03258	0.04176	0.02817	0.02769	0.04532	0.07711	0.08362	0.7708	0.6201	Shore hypermethylation
TCGA-EI-7004-01	2.22329	0.8038	0.7607	0.4562	0.4779	0.606	0.5418	0.2171	0.2659	0.06091	0.04048	0.02803	0.03607	0.09581	0.08872	0.79	0.4575	Shore hypermethylation
TCGA-CI-6622-01	0.59455	0.916	0.9396	0.666	0.7168	0.3193	0.0384	0.01851	0.04066	0.05737	0.02782	0.02031	0.03393	0.05396	0.03516	0.7973	0.872	Shore hypermethylation
TCGA-CL-4957-01	0.696007	0.8207	0.8979	0.629	0.7703	0.04934	0.05542	0.01686	0.03274	0.03827	0.03181	0.02542	0.02768	0.04352	0.0423	0.798	0.4466	Shore hypermethylation
TCGA-EI-6512-01	0.659921	0.8202	0.7628	0.6483	0.6964	0.1941	0.2435	0.07358	0.03159	0.03441	0.02871	0.03039	0.02284	0.0816	0.2385	0.8086	0.5302	Shore hypermethylation
TCGA-AF-A56N-01	1.24487	0.342	0.846	0.6505	0.7055	0.3276	0.3698	0.5033	0.3047	0.2667	0.263	0.2749	0.03135	0.07323	0.09398	0.8596	0.5425	Shore hypermethylation
TCGA-CL-5917-01	0.933562	0.7344	0.9193	0.4758	0.506	0.07841	0.03364	0.02388	0.03998	0.0624	0.03797	0.02277	0.03106	0.06393	0.04443	0.874	0.8964	Shore hypermethylation
TCGA-AH-6903-01	0.505923	0.8608	0.9298	0.5283	0.5794	0.4798	0.4931	0.587	0.154	0.06943	0.0532	0.05035	0.04008	0.2439	0.06634	0.8804	0.6183	Shore hypermethylation
TCGA-AH-6644-01	1.43297	0.6602	0.9189	0.6545	0.7243	0.07884	0.0677	0.02787	0.04242	0.04318	0.02755	0.02758	0.03213	0.05214	0.06017	0.8998	0.4932	Shore hypermethylation
TCGA-DC-6682-01	0.887511	0.8942	0.9156	0.5713	0.5271	0.07351	0.03378	0.01923	0.03685	0.04115	0.02937	0.02272	0.02752	0.0926	0.09071	0.9132	0.886	Shore hypermethylation
TCGA-AH-6544-01	0.433078	0.9076	0.9307	0.6416	0.6341	0.09294	0.2725	0.02161	0.0402	0.05193	0.0398	0.02136	0.03825	0.08222	0.1061	0.9237	0.7141	Shore hypermethylation
TCGA-DT-5265-01	0.823748	0.9107	0.949	0.6213	0.6052	0.4785	0.5603	0.4499	0.3753	0.3948	0.4273	0.346	0.05016	0.3071	0.1334	0.9255	0.8774	Shore hypermethylation
TCGA-F5-6571-01	1.20162	0.8716	0.9462	0.6946	0.7836	0.1149	0.1807	0.01951	0.03215	0.06165	0.03065	0.02293	0.04557	0.08271	0.07181	0.9353	0.8603	Shore hypermethylation
TCGA-AG-3731-01	1.68278	0.7793	0.8028	0.1426	0.2255	0.353	0.3806	0.5208	0.2669	0.2724	0.3145	0.05421	0.03033	0.09594	0.107	0.8076	0.5565	CpG island hypermethylation
TCGA-AG-3725-11	0.464706	0.8429	0.8869	0.3229	0.2884	0.05255	0.02803	0.01806	0.03063	0.0513	0.0242	0.02315	0.02904	0.06868	0.04091	0.8387	0.9052	Normal tissue
TCGA-AG-3731-11	1.28094	0.8747	0.9013	0.2113	0.1746	0.06403	0.04171	0.01599	0.03617	0.03182	0.02288	0.0243	0.02714	0.07019	0.05313	0.8575	0.8639	Normal tissue

## Sheet: Key
Methylation beta-values >0.5 highlighted in orange.
Methylation beta-values <0.4 highlighted in pink.
CpG sites cg26255261 and cg02551980 show hypermethylation in both normal and cancer tissue (green).
